# Protein arginine and lysine methylation in *Trypanosoma cruzi*

Rafael Fogaça de Almeida<sup>a</sup>, Aline Castro Rodrigues Lucena<sup>b</sup>, Michel Batista<sup>b,c</sup>, Fabricio Klerynton Marchini<sup>b,c</sup>, Lyrís Martins Franco de Godoy<sup>a,\*</sup>

<sup>a</sup> Laboratório de Biologia Molecular e Sistêmica de Tripanossomatídeos, Instituto Carlos Chagas, Fundação Oswaldo Cruz, Curitiba, 81350010, Parana, Brazil

<sup>b</sup> Laboratório de Ciências e Tecnologias Aplicadas em Saúde, Instituto Carlos Chagas, Fundação Oswaldo Cruz, Curitiba, 81350010, Parana, Brazil

<sup>c</sup> Plataforma de Espectrometria de Massas, Instituto Carlos Chagas, Fundação Oswaldo Cruz, Curitiba, 81350010, Parana, Brazil

\* Corresponding author:

Lyrís Martins Franco de Godoy; e-mail: [lyris.godoy@fiocruz.br](mailto:lyris.godoy@fiocruz.br)

## ABSTRACT

Post-translational methylation of proteins, which occurs in arginines and lysines, modulates several biological processes at different levels of cell signaling. Recently, methylation has been demonstrated in the regulation beyond histones, for example, in the dynamics of protein-protein interaction and protein-nucleic acid. Mass spectrometry-based proteomics has allowed a large-scale identification of protein methylation - mainly in arginine residues-, in different organisms, including some trypanosomes. However, the presence and role of protein methylation in *Trypanosoma cruzi*, the etiologic agent of Chagas disease, has not yet been elucidated. In this work, we applied mass spectrometry and described the arginine and lysine methylproteome of *T. cruzi*. In epimastigotes, 1336 methylsites (657 methyl-arginines and 679 methyl-lysines) in 878 methylated proteins were identified by LC-MS/MS. Our functional and interaction analyzes show that protein methylation impacts different biological processes, with emphasis on translation. Separately, protein arginine methylation is related to oxiredution and carbohydrate metabolism, while lysine methylation impacts the protein synthesis. In addition, 50 methylated proteins have been previously described with phosphorylation sites in *T. cruzi*, represented by RNA binding proteins, sterol methyltransferase activity and calpain peptidases, indicating the possibility of crosstalk in

the regulation of these proteins. This work represents the first proteomic analysis of *T. cruzi* methylproteome and is the first to characterize lysine methylation in trypanosomatids. Collectively, these data inform about new fundamental biological aspects of this organism impacted by protein methylation, that can contribute to the identification of pathways and key pieces in the biology of this human pathogen.

Keywords: *Trypanosoma cruzi*. Protein methylation. Proteomics. LC-MS/MS.

## Biological significance

*Trypanosoma cruzi* is a protozoan parasite that causes Chagas' disease in humans and throughout its life cycle faces different environment changes. Protein methylation is an important post-translational modification by which cells respond and adapt to the environment. To understand the importance of protein methylation in *T. cruzi* biology, we applied a mass spectrometry-based proteomics (GeLC-MS/MS) and report the first proteomic analysis of both arginine and lysine methylproteome in *T. cruzi*, being the first large-scale characterization of lysine methylation in trypanosomes. Our data demonstrate that the methylation of proteins in *T. cruzi* is broad and impacts different cellular processes. This study represents a significant advance on the importance of protein methylation in trypanosomes.

## Highlights

- First methylproteome description of human parasite *T. cruzi* and first of lysine methylation in trypanosomes;
- Protein arginine and lysine methylation is widely found in *T. cruzi* epimastigotes;
- Different processes are impacted by protein methylation in *T. cruzi*, mainly the protein synthesis;
- 50 methylated proteins have been previously described with phosphorylation sites in *T. cruzi*.

## 1. Introduction

Post-translational modifications (PTMs) impact different biological functions and significantly contribute to cellular homeostasis and environment adaptation [1]. Among them, an important PTM is protein methylation [2,3], which occurs in lysine and arginine residues and impacts fundamental cellular events, from gene transcription and RNA processing to protein translation and cell signaling [4].

Arginine and lysine methylation are catalyzed by S-adenosylmethionine (SAM)-dependent protein arginine methyltransferases (PRMTs) and protein lysine methyltransferases (PKMTs), respectively [5]. In humans, the most common PRMT is the type I, which catalyzes the formation of monomethyl-arginine (MMA/Rme1) transferring a methyl group from SAM to guanidino nitrogen, and can add a second methyl group at the same nitrogen, resulting an asymmetric dimethyl-arginine (ADMA/Rme2a) [6]. Type II PRMTs also catalyze the synthesis of MMA and can add one second methyl group at the terminal nitrogen adjacent, resulting in symmetric dimethyl-arginine (SDMA/Rme2s) [6]. Protein lysine methyltransferases (PKMTs) catalyze the addition of up to three methyl groups at the  $\epsilon$ -amino group of lysine residue (Kme1, Kme2 and Kme3). Most known human PRMTs and PKMTs can methylate both histone and non-histone proteins [7] and are potential drug targets due to the fundamental roles in the cell biology [8].

The kinetoplastid protozoan parasite *Trypanosoma cruzi* is the etiologic agent of Chagas disease [9], an illness that is estimated to affect about 6 to 7 million people worldwide [10] and represents a significant burden to the health-care system [11,12]. No vaccine is available and treatment is carried out with inefficient and highly toxic drugs [13]. In addition, *T. cruzi* is a parasite that has a complex life cycle (such another trypanosomes like *T. brucei* and *Leishmania* sp.) with different stages of development, such as epimastigote form that is subject of this study, and different hosts therefore is necessary to adapt to different conditions and for that is an interesting organism to study the biological impact of PTMs.

Large-scale protein methylation analysis although relatively well known in higher eukaryotes [14–20], in protozoan parasites are scarce and the function of arginine and lysine methylation in these organisms is still poorly understood, especially for the kinetoplastids. In *Plasmodium falciparum*, arginine [21] and lysine [22] methylated proteins are involved in diverse biological pathways, for example, RNA metabolism, protein synthesis, transport, proteolysis, protein folding and chromatin organization. In the deep-branching *Giardia duodenalis* [23], interestingly, methyl-arginines (and arginine-methyltransferases) are absent, but their biological functions appear to be compensated by methyl-lysines, which are regulated between its different life-cycle stages. For the TriTryps, global studies about protein methylation are only available for *Leishmania* and *T. brucei*. For *Leishmania*, only 19 methylated proteins were identified in *L. donovani*, among them are RNA binding proteins, ribosomal proteins, Elongation factor 1- $\alpha$ [24] and, more recently, 40 putative PRMT7 targets were described in *L. major* [25], including 17 RNA binding proteins (RBPs), introducing the importance of arginine methylation in the RNA metabolism of this parasite. In *T. brucei*, approximately 10% of the proteome contains methyl-arginines, which potentially impact diverse

cellular pathways in this parasite [26,27], but no global study about lysine methylation is available. Here, we applied a bottom-up proteomic approach to comprehensively characterize the *T. cruzi* methylproteome of arginine and lysine residues. Using mass spectrometry (MS), we identified more than a thousand of methylsites present in proteins involved in many biological functions and interesting features are associated to the *T. cruzi* arginine and lysine methylated proteins. To the best of our knowledge, this is the largest study of methylproteome of protozoa parasites. It sheds light to important processes that are potentially regulated by protein methylation and provides another promising landscape to understanding the biology of this pathogen.

## 2. Materials and Methods

### 2.1 Cell culture

*T. cruzi* Dm28c epimastigotes in exponential growth phase were cultured in Liver Infusion Tryptose (LIT) medium [28] supplemented with 10% fetal bovine serum and incubated without agitation at 28 °C. Exponential epimastigotes were obtained in the order of  $4.3 \times 10^9$  cells.

### 2.2 Protein extraction, separation and digestion

For protein extraction, epimastigotes cells were washed in PBS, resuspended in lysis buffer (4% SDS, 10 mM Tris-HCl pH 7.5, 100 mM DTT) in a proportion of 240  $\mu$ L for each  $3 \times 10^8$  cells, vortexed for 30 seconds, heated for 3 min at 95 °C and sonicated for 1 hour at room temperature. To remove debris, samples were then centrifuged at 20,000 xg at 20 °C for 5 min and the supernatant (protein extract) was transferred to a clean tube. *T. cruzi* protein extract (25 ug) was separated by SDS-PAGE (5 - 20% acrylamide) in five lanes (5  $\mu$ g/lane) and stained with Coomassie Blue. Each lane was sliced horizontally into 10 fractions covering the different molecular weight ranges and each gel fraction was cut into 1 mm<sup>3</sup> cubes, which were transferred to a clean microfuge tube and submitted to in-gel digestion as previously described [29]. Briefly, the gel pieces were destained twice with 25 mM ammonium bicarbonate (ABC) in 50% ethanol, dehydrated with 100% ethanol, reduced with 10 mM DTT in 50 mM ABC, alkylated with 55 mM iodoacetamide in 50 mM ABC and digested with 12.5 ng/ $\mu$ L trypsin in 50 mM ABC and incubated for 16h at 37°C. Digestion was stopped by adding trifluoroacetic acid (TFA) to a final concentration of 0.5%. Peptides were extracted twice with 30% acetonitrile (MeCN) in 3% TFA and twice with 100% MeCN,

them dried in a Speed Vac (Thermo Scientific) and desalted using C18 StageTips [30] prior to nanoLC-ESI-MS/MS.

### 2.3 NanoLC-ESI-MS/MS analysis

Tryptic peptides were separated by online reverse phase (RP) nanoscale capillary liquid chromatography (nanoLC) and analyzed by electrospray mass spectrometry in tandem (ESI-MS/MS). The samples were analyzed at the mass spectrometry facility P02-004/Carlos Chagas Institute - Fiocruz Parana with an Easy-nLC 1000 system (Thermo Fisher Scientific) connected to an LTQ-Orbitrap XL ETD mass spectrometer (Thermo Fisher Scientific) equipped with a nanoelectrospray ion source (Phoenix S&T). Peptide mixtures were injected in a 30 cm analytical column (75  $\mu$ m inner diameter) in-house packed with C18 resin (ReproSil-Pur C18-AQ 2.4  $\mu$ m), eluted from 5 to 40% MeCN in 5% DMSO and 0.1% formic acid in a 120 min gradient. The nanoLC column was heated at 60 °C to improve both chromatographic resolution and reproducibility. Peptides were ionized by nanoelectrospray (voltage, 2.7 kV) and injected into the mass spectrometer. Mass spectra were obtained by Data-Dependent Acquisition (DDA), with an initial Orbitrap scan with resolution  $R = 15,000$  followed by MS/MS of the 10 most intense ions in LTQ (Iontrap). These precursor ions are fragmented by Collision-Induced Dissociation (CID) with normalized collision energy = 35%, activation time of 30 ms and activation  $q = 0.25$ . Singly charged precursor ions were rejected. Parallel to the MS2 was conducted a full scan in Orbitrap with a resolution  $R = 60,000$  (mass range  $m/z$  300-2000) and selected ions were dynamically excluded for 90 seconds. The lock mass option [31], in presence of DMSO peaks [32], was used in all full scans to improve mass accuracy of precursor ions.

### 2.4 Search and identification of peptide/protein

The analysis of the raw data from the LC-MS/MS was performed by MaxQuant platform [33], version 1.5.2.8. The proteins were identified against a database with a total of 19,242 protein sequences of *T. cruzi* CL Brener, downloaded on January 04, 2016 from UniProt ([www.uniprot.org](http://www.uniprot.org)). Contaminants (human keratins, BSA and porcine trypsin) were added to the database, as well as their reverse sequences. The search for methylated sites follows the criteria: MS tolerance of 20 ppm (Orbitrap), MS/MS tolerance of 0.5 Da (Iontrap), allowing for 2 missed cleavages. The peptides length searched with at least 7 amino acids. Carbamidomethylation of cysteines was determined as fixed modification. Monomethylation and dimethylation of lysines and arginines and trimethylation of lysines were searched as variable

modifications, as well as oxidation of methionines. A false discovery rate (FDR) of 1% was applied to the protein, peptide and methylsite level.

## 2.5 Bioinformatics analyses of *T. cruzi* methylproteome

The functional classification and enrichment analyzes of Gene Ontology (GO)[34], Clusters of Orthologous Groups (COG) [35] and Kyoto Encyclopedia of Genes and Genomes (KEGG)[36] were performed using the Database for Annotation, Visualization and Integrated Discovery (DAVID) tool [37,38], version 6.8 (<https://david.ncifcrf.gov>). For the enrichment analysis, FDR was applied for multiple tests correction, as proposed by Benjamini and Hochberg [39] with cutoff  $\leq 0.05$ . Protein consensus sequences analyses were performed using the iceLogo [40] with the *T. cruzi* Swiss-Prot proteome as reference set. The protein-protein interactions were visualized using STRING[41] in Cytoscape (v.3.8) [42].

## 3. Results

### 3.1 GeLC-MS/MS analysis reveals abundant arginine and lysine methylation in *T. cruzi* epimastigotes

We applied a typical bottom-up proteomic approach to characterize the methylproteome of arginine and lysine residues of *T. cruzi* epimastigotes (Fig. 1).

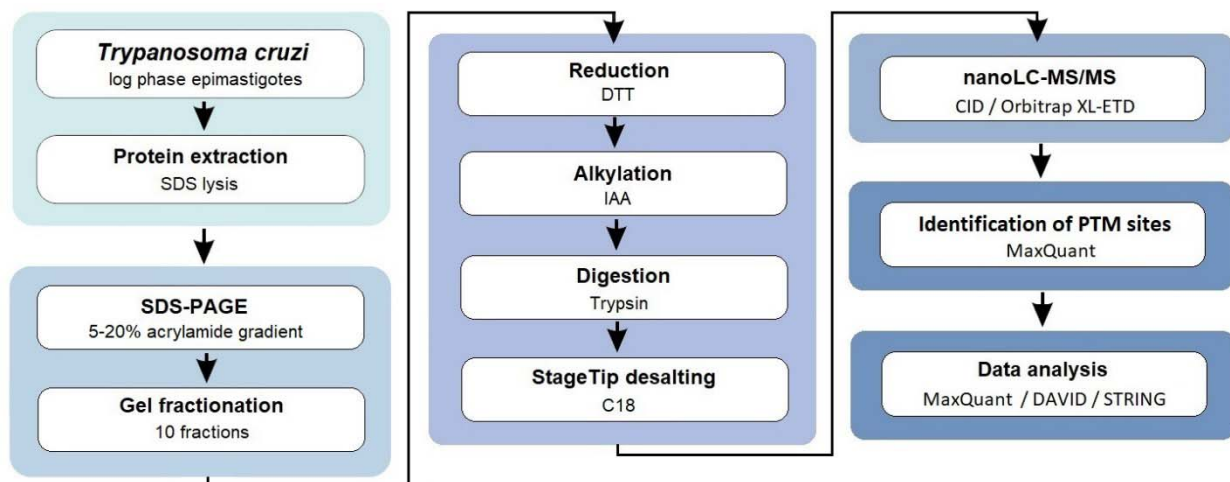

**Figure 1. Proteomic workflow applied to characterize the *T. cruzi* methylproteome of arginine and lysine.** Cells are harvested and proteins extracted through SDS lysis, followed sonication and centrifugation. Protein was separated by SDS-PAGE 5 to 20% acrylamide gradient. Gel was fractionated in 10 fractions, each fraction was reduced, alkylated and then digested with trypsin for 16h. Peptides were purified on C18 microcolumns and analysed by LC-MS/MS. Proteins and methylsites was searched on MaxQuant. Data was analyzed with different proteomic tools.

Our analysis of the total *T. cruzi* protein extract resulted in the acquisition of 116405 MS/MS spectra, 51323 (approximately 44%) of which were identified when confronted with the database. After exclusion of the identified contaminants and reverse sequences, a total of 20577 peptides and 4133 proteins were identified. Among them, 878 methylated proteins (Table S1) and total of 1336 methylsites (Table S2) were detected, 1263 (94.5%) with a high localization probability score ( $\geq 0.75$ ) according with MaxQuant analysis [43]. The frequency and distribution of the different methylation types (mono-, di- and trimethylation) in *T. cruzi* epimastigotes are shown in Fig. 2. Among the methylated proteins identified (878), the majority was identified with methylpeptides bearing only one type of methylation, being monomethyl sites (58.3%) the most abundant, followed by dimethyl (24.8%) and trimethyl sites (5.6%). Moreover, some methylated proteins were identified with more than one type of methylation: mono and dimethylation sites (5.2%), mono and trimethyl sites (0.3%), di and trimethyl sites (5.1%) and mono, di and trimethylation sites (0.5%). Overall, methylation sites were almost equally distributed between arginine (657; 49%) and lysine (679; 51%) residues. Among the methylation sites, 700 (52%) represent monomethylation (363 Kme, 337 Rme), 507 (38%) dimethylation (187 Kme2, 320 Rme2) and 129 (10%) trimethylation (Kme3).

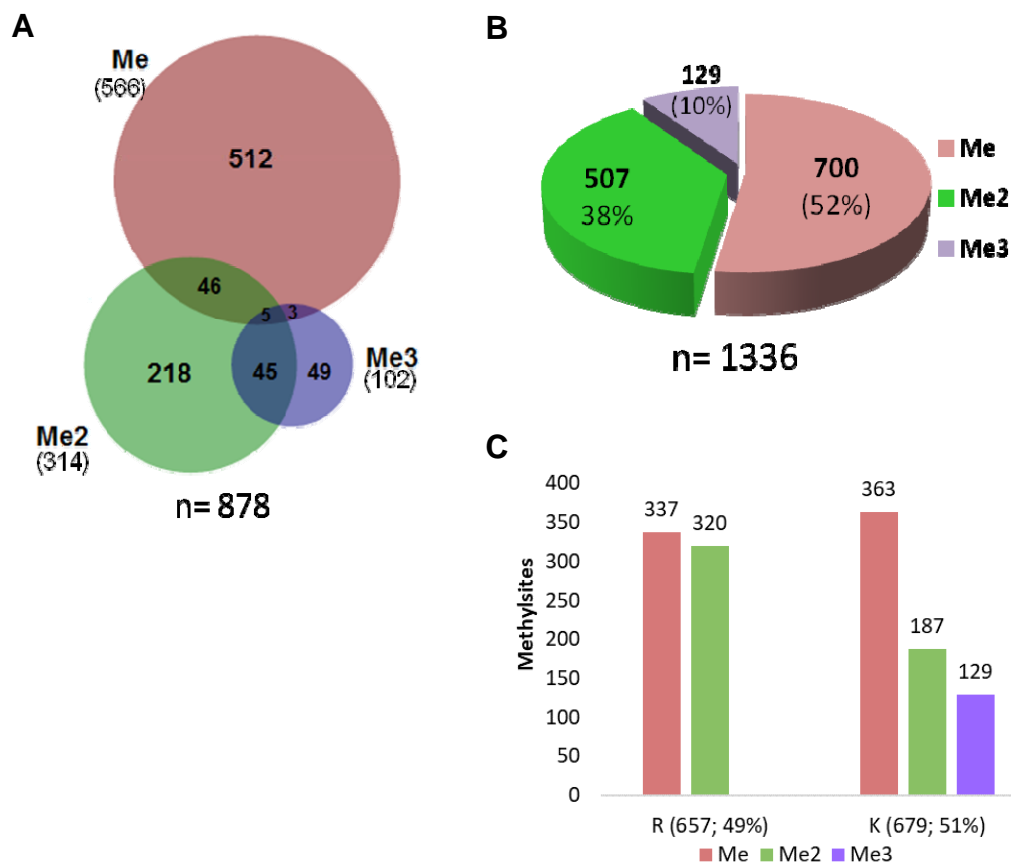

**Figure 2. Distribution of methylation events identified in *T. cruzi* epimastigotes.** Venn diagram showing the overlap of methylation types (Me, Me2 and Me3) in the identified methylated proteins (A), distribution of the identified methylation sites for the methylation type (Me, Me2 and Me3) (B); and distribution of the methylation sites (Me, Me2 and Me3) in the amino acids arginine (R) and lysine (K) (C).

**3.2 *T. cruzi* arginine and lysine methylsites are surrounded by different amino acid pattern**

In order to identify amino acids patterns surrounding methylsites in *T. cruzi*, we investigate the amino acids frequencies surrounding sites and different amino acids are more frequent in the vicinity of lysine and arginine (Fig. 3). Methyl-lysine sites are enriched for glutamic acid (E/Glu at 192 positions -1, +2, +3 and +4) and cysteine (C/Cys at positions -1, -2, -3 and -4 positions). Methyl-arginines are enriched upstream for Methionine (M/Met), Cysteine (C/Cys) and Arginine (Arg) and downstream for Arginines

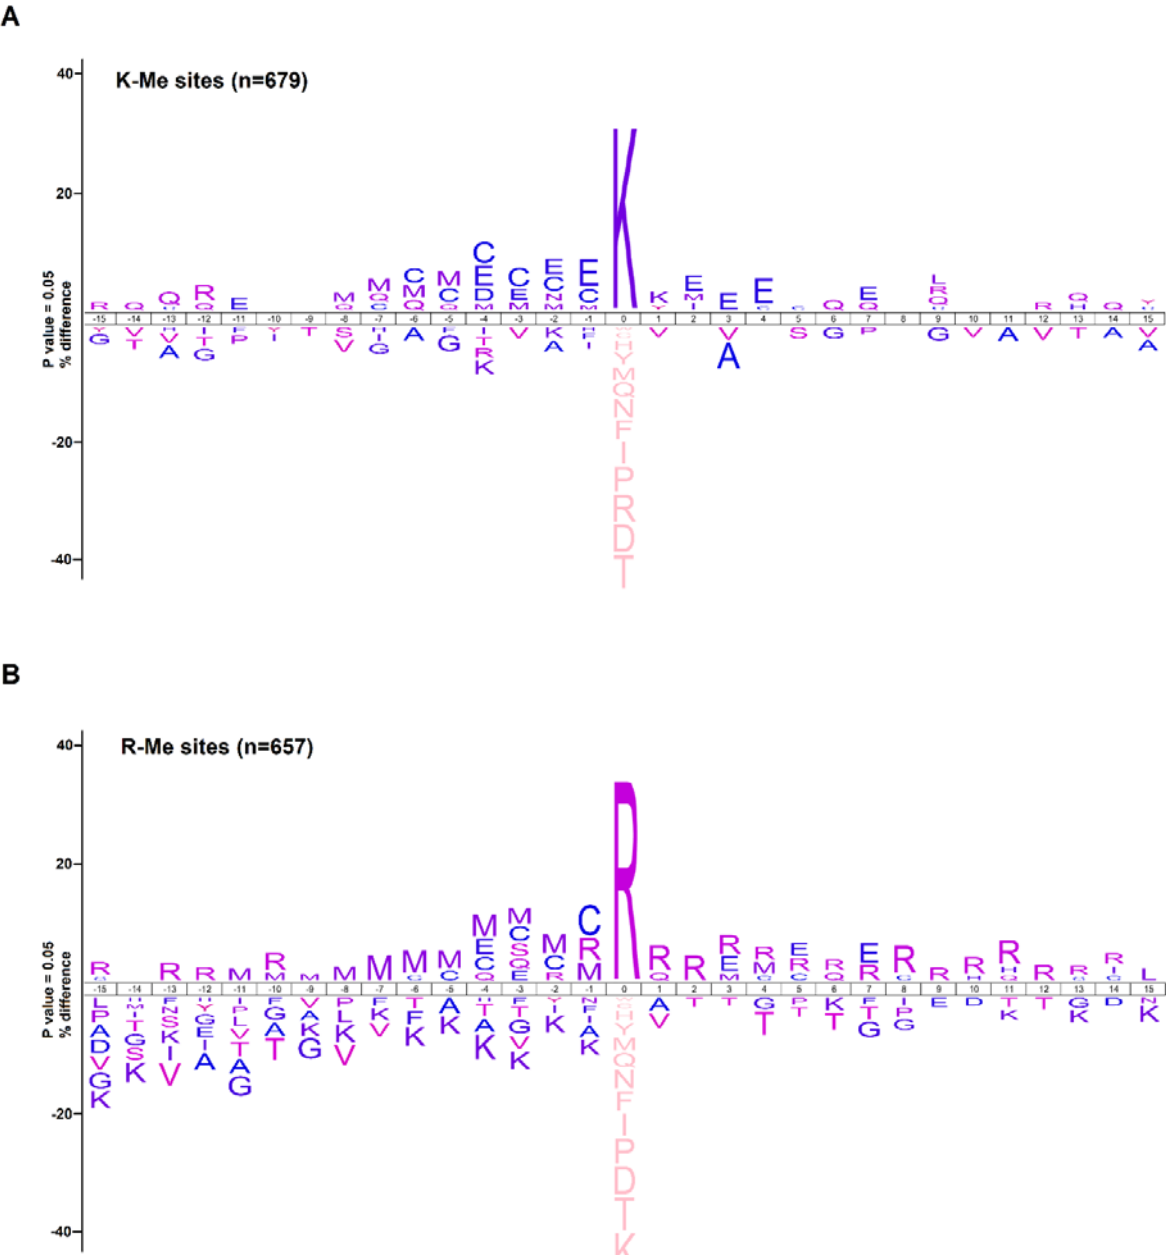

(R/Arg).

**Figure 3. Visualization of protein consensus sequences for methyl-arginines and methyl-lysines in *T. cruzi*.** Frequency of residues in modification window  $\pm 15$  residues from the lysine (A) and arginine (B) modification site, only significant amino acids are shown (p-value 0.05).

### 3.3 Methylated proteins impact numerous processes in *T. cruzi*

To identify the pathways potentially regulated by methylated proteins in *T. cruzi* epimastigotes, we performed functional classification and enrichment analysis of GO, COG and KEGG terms. For the presentation of the results, classes containing 5 proteins or more were illustrated individually, while classes containing less than 5 proteins were grouped in the “other” category. The complete classification and enrichment lists are available in Table S3 and Table S4, respectively.

For cellular component (CC) analysis (Fig. 4), the GO classification terms were available for a subset of 285 (32.4%) of the methylated proteins, distributed in 59 (Table S3) and enriched in 5 (Table S4) different classes. As shown in Fig. 4A, the methylated proteins are localized across the entire cell, from membranes, to cytoplasm to nucleus and other organelles, while the enrichment analysis (Fig. 4B) revealed that they are mainly involved with ribosomes, nucleosomes and cytoplasm.

For the biological process (BP) analysis (Fig. 5), the GO classification terms were available for 295 (33.6%) of the methylated proteins, distributed in 143 (Table S3) and enriched in 11 (Table S4) different classes. Methylation proteins of *T. cruzi* was mainly related to translation, protein folding, cellular movement, pathogenesis, membrane and intracellular transport, redox metabolism and a wide variety of other processes (Fig. 5A). For the enriched biological processes are spotlighted the response to stress, metabolism of amino acids and carboxylic acid, among others, such translation and oxidation-reduction process (Fig. 5B).

For the molecular function (MF) analysis (Fig. 6), the GO classification terms were available for a subset of 415 (47.2%) of the methylated proteins, distributed in 210 (Table S3) and enriched in 8 (Table S4) different classes. In agreement with the cellular component and biological processes results, the most represented (Fig. 6A) and enriched (Fig 6B) molecular functions affected by methylation included nucleic acid, metabolite and ion binding, among others, which are ultimately related to protein synthesis, cellular redox homeostasis and other metabolic and catabolic processes.

**A**

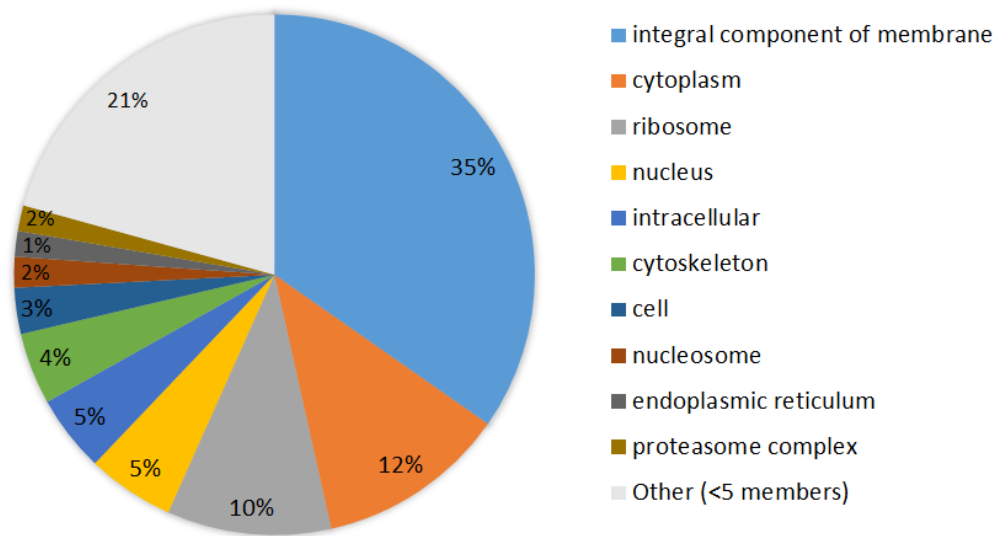

**B**

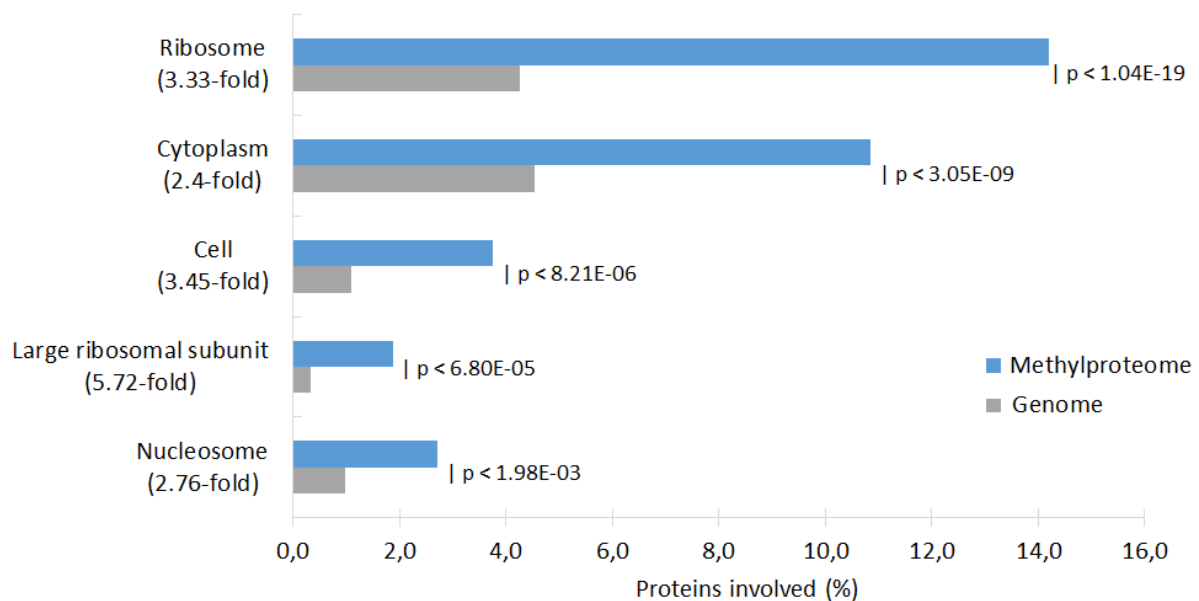

**Figure 4. Analysis of methylated proteins according to cellular localization.** Functional classification (A) and significantly enriched cellular components (B) of methylated proteins identified.

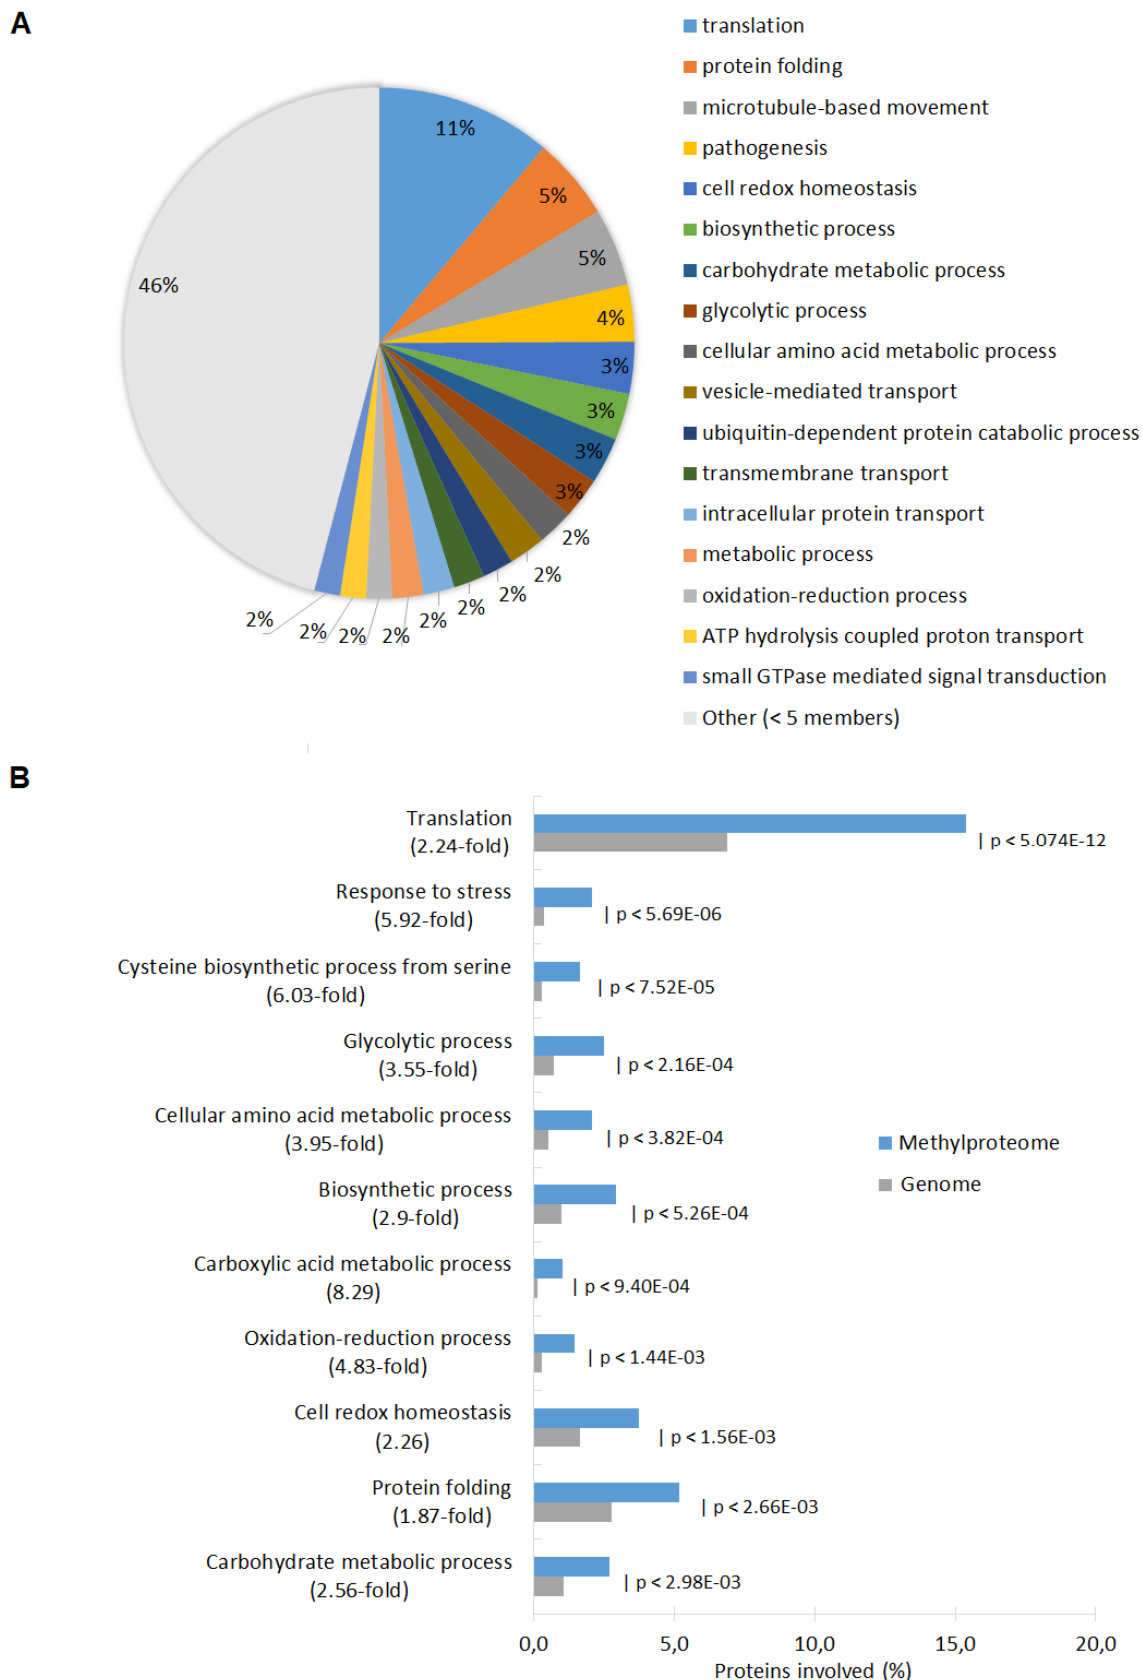

**Figure 5. Analysis of methylated proteins according to biological process.** Functional classification (A) and significantly enriched biological processes (B) of methylated proteins identified.

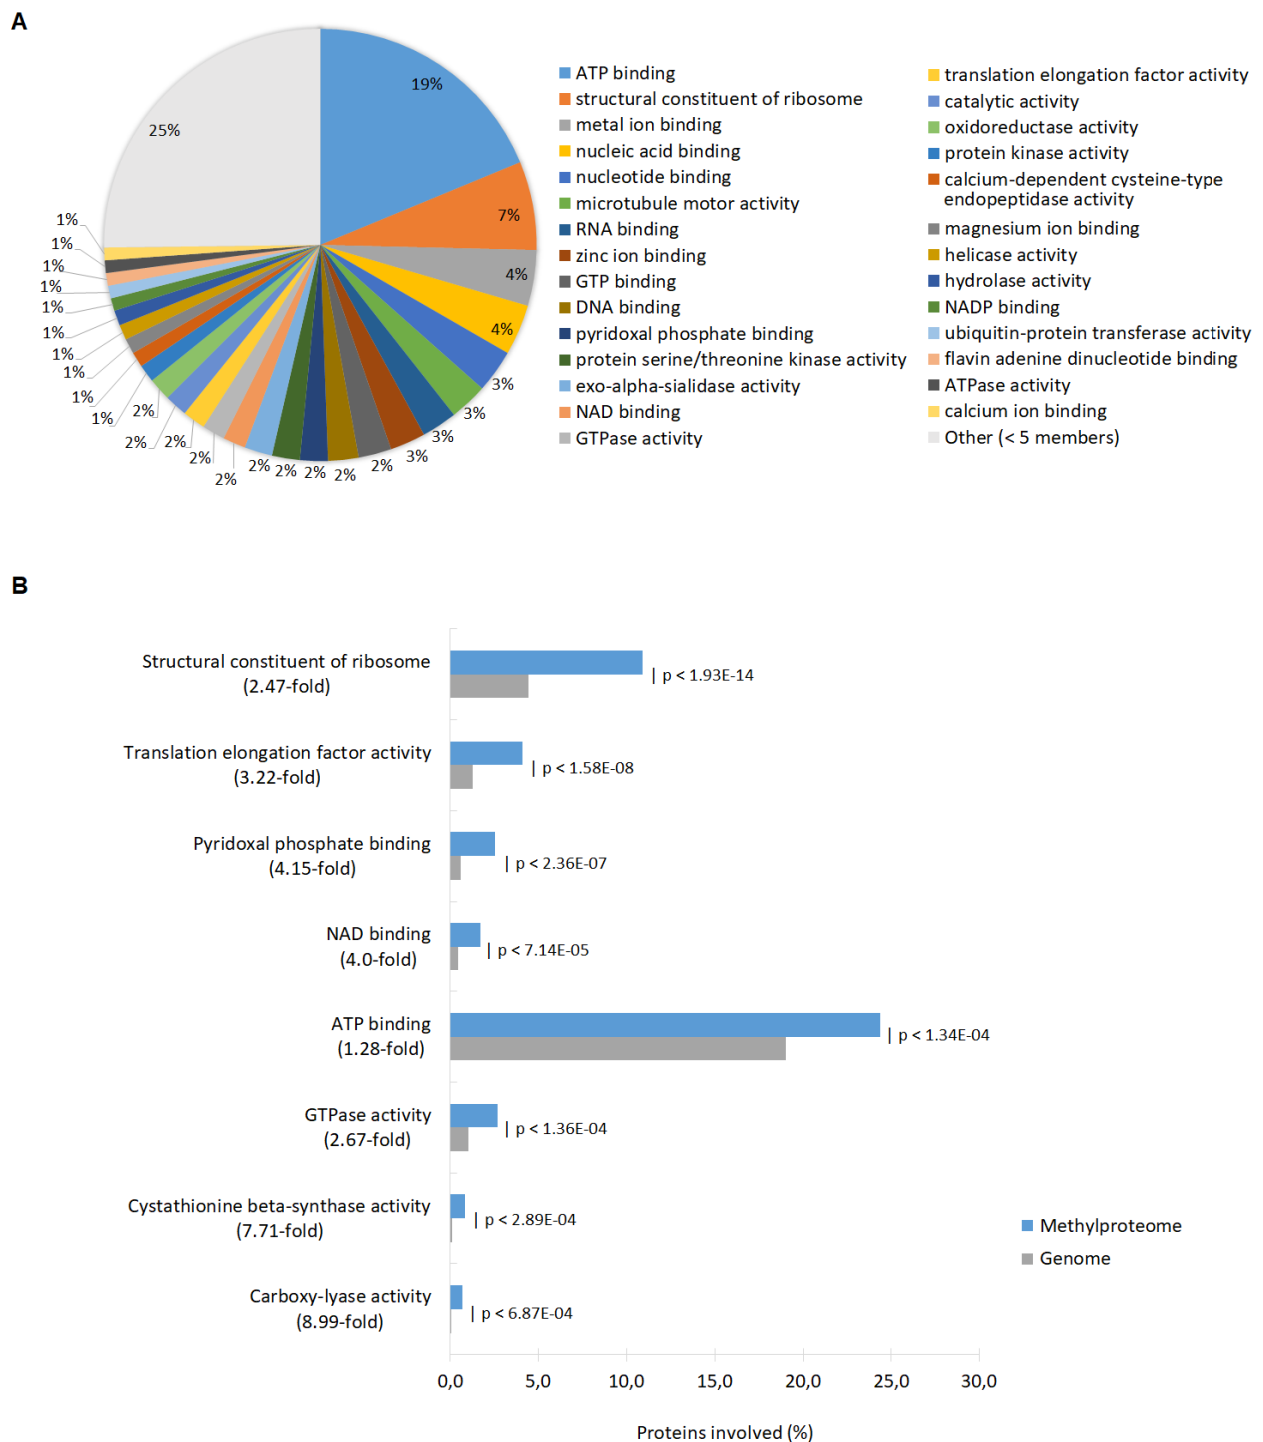

**Figure 6. Analysis of methylated proteins according to molecular function.** Functional classification (A) and significantly enriched molecular functions (B) of methylated proteins identified.

The analysis of the *T. cruzi* methylproteome against the other two systematic gene functional databases (COG and KEGG) support the multiple functions associated to methylated proteins described above. The COG classification showed clusters of proteins with functions commonly associated to methylproteomes analysis in other species [27], such RNA metabolism and intracellular trafficking and cytoskeleton (Fig. S1). The KEGG classification identified multiple pathways associated to the methylated proteins (Fig. S2) and, interestingly, biosynthesis of secondary metabolites and antibiotics are also well represented. In order to ensure the comparison of our data with previously reported, we reanalyzed the *T. brucei* data [27] with the same tools and parameters used for *T. cruzi* in the present work. As expected, the methylated proteins in arginine are associated with the cytoskeleton and involved with locomotion, including the presence of kinesins. The comparison between the processes impacted by the arginine methylproteome in *T. cruzi* and *T. brucei* presents marked differences.

### 3.4 Lysine methylation impact different processes compared to arginine methylation in *T. cruzi*

To evaluate whether different cellular functions are being regulated by the Kme and Rme subproteomes, we performed enrichment analysis with the sets of arginine and lysine-methylated proteins separately (Table 1 and Table 2). As can be seen, a wider variety of functional categories have been enriched among the lysine-methylated proteins in relation to the arginine-methylated proteins. In addition, the terms enriched are indeed different between the two subproteomes. Lysine methylation appears to be more strongly associated with the translation and other protein-related processes, as indicated by the enrichment of several related classes, such as amino acid transport and metabolism (COG), translation (BP), ribosome (CC), structural constituent of ribosome (MF) and ribosome (KEGG) (Table 1). On the other hand, arginine methylation mainly impacts oxidation processes and metabolism of carbohydrates, as illustrated by the enrichment of classes such as *oxidation-reduction* and *carbohydrate metabolic process* (BP), *Proton-transporting two-sector ATPase complex* and *catalytic domain* (CC) and *Pyridoxal phosphate binding* (MF), among others (Table 2).

**Table 1** - Functional categories enriched among proteins observed to be lysine-methylated in *T. cruzi*

| Category                              | Term                                      | Count | Fold Enrichment | PValue   | BH <sup>*</sup> |
|---------------------------------------|-------------------------------------------|-------|-----------------|----------|-----------------|
| <b>Clusters of Orthologous Groups</b> | Amino acid transport and metabolism       | 11    | 2.89            | 2.94E-03 | 4.89E-02        |
| <b>Biological Process</b>             | Translation                               | 50    | 2.66            | 8.93E-11 | 8.84E-09        |
|                                       | Cysteine biosynthetic process from serine | 8     | 10.62           | 1.66E-06 | 8.23E-05        |
|                                       | Response to stress                        | 7     | 7.3             | 1.80E-04 | 5.92E-03        |
|                                       | Glycolytic process                        | 9     | 4.69            | 3.96E-04 | 9.76E-03        |
| <b>Cellular Component</b>             | Ribosome                                  | 45    | 4.22            | 1.04E-16 | 4.77E-15        |
|                                       | Large ribosomal subunit                   | 9     | 10.97           | 5.25E-07 | 1.13E-05        |
|                                       | Cytoplasm                                 | 30    | 2.65            | 1.97E-06 | 2.82E-05        |
|                                       | Cell                                      | 12    | 4.41            | 6.31E-05 | 6.78E-04        |
|                                       | Endoplasmic reticulum                     | 5     | 7.24            | 4.04E-03 | 3.42E-02        |
|                                       | Proteasome activator complex              | 3     | 23.16           | 5.37E-03 | 3.79E-02        |
| <b>Molecular Function</b>             | Structural constituent of ribosome        | 52    | 2.97            | 1.19E-12 | 1.84E-10        |
|                                       | GTPase activity                           | 16    | 4               | 6.02E-06 | 4.67E-04        |
|                                       | Cystathionine beta-synthase activity      | 6     | 13.73           | 1.73E-05 | 8.94E-04        |
|                                       | Translation elongation factor activity    | 16    | 3.16            | 1.16E-04 | 4.47E-03        |
|                                       | NADP binding                              | 7     | 7.01            | 2.64E-04 | 8.14E-03        |
| <b>KEGG Pathways</b>                  | Ribosome                                  | 56    | 1.87            | 6.17E-07 | 4.01E-05        |
|                                       | Biosynthesis of amino acids               | 26    | 2.06            | 3.41E-04 | 1.10E-02        |
|                                       | Biosynthesis of antibiotics               | 47    | 1.61            | 3.99E-04 | 8.61E-03        |
|                                       | Cysteine and methionine metabolism        | 16    | 2.64            | 4.80E-04 | 7.76E-03        |
|                                       | Glycolysis / Gluconeogenesis              | 19    | 2.34            | 5.92E-04 | 7.66E-03        |
|                                       | Glycine, serine and threonine metabolism  | 11    | 2.75            | 3.98E-03 | 4.23E-02        |

\*Benjamini-Hochberg  $\leq 0.05$ .

**Table 2** - Functional categories enriched among proteins observed to be arginine-methylated in *T. cruzi*

| Category                  | Term                                                            | Count | Fold Enrichment | PValue   | BH <sup>*</sup> |
|---------------------------|-----------------------------------------------------------------|-------|-----------------|----------|-----------------|
| <b>Biological Process</b> | Oxidation-reduction process                                     | 6     | 8.37            | 4.00E-04 | 4.11E-02        |
|                           | Biosynthetic process                                            | 10    | 4.19            | 4.29E-04 | 2.23E-02        |
|                           | Carbohydrate metabolic process                                  | 10    | 3.99            | 6.31E-04 | 2.18E-02        |
| <b>Cellular Component</b> | Cytoplasm                                                       | 34    | 3.25            | 2.00E-09 | 8.80E-08        |
|                           | Cytosolic small ribosomal subunit                               | 4     | 14.32           | 1.92E-03 | 4.15E-02        |
|                           | Proton-transporting two-sector ATPase complex, catalytic domain | 3     | 25.06           | 4.59E-03 | 4.94E-02        |
| <b>Molecular Function</b> | Pyridoxal phosphate binding                                     | 12    | 6.21            | 1.72E-06 | 2.55E-04        |
|                           | L-alanine:2-oxoglutarate aminotransferase                       | 4     | 20.19           | 4.59E-04 | 3.34E-02        |

\*Benjamini-Hochberg  $\leq 0.05$ .

### 3.5 Protein-protein interaction analysis present a global view of the methylproteome network

To evaluate the protein network impacted by methylated proteins in *T. cruzi*, we performed protein-protein interaction (PPIs) analysis for the subset of 187 proteins present in the PPI database. As can be seen in Fig. 7, proteins bearing K and R methylation (or both) vastly interact with each other. The highest degree of interaction occurs for methylated proteins related to translation, such as ribosomal proteins and translation initiation factors. A few clusters of interaction that are biased, or exclusive, to only to one type of methylation also exist. For example, the network related to aminoacyl-tRNA synthesis, which is mainly R-Me modified, similarly to that shown for other eukaryotes [14] and the small ones related to splicing and fatty acid metabolism, which have only K-methylated proteins. In addition, we also constructed the interaction network of the K-Me and R-Me subproteomes separately (Fig. S4), to which 95 and 93 proteins could be mapped, respectively. Despite the similar number of proteins mapped on both maps, the clusters of the R-Me map are more connected than the clusters of the K-Me map, which has smaller and isolated clusters. Detailed data about protein interaction analysis are available in Table S5.

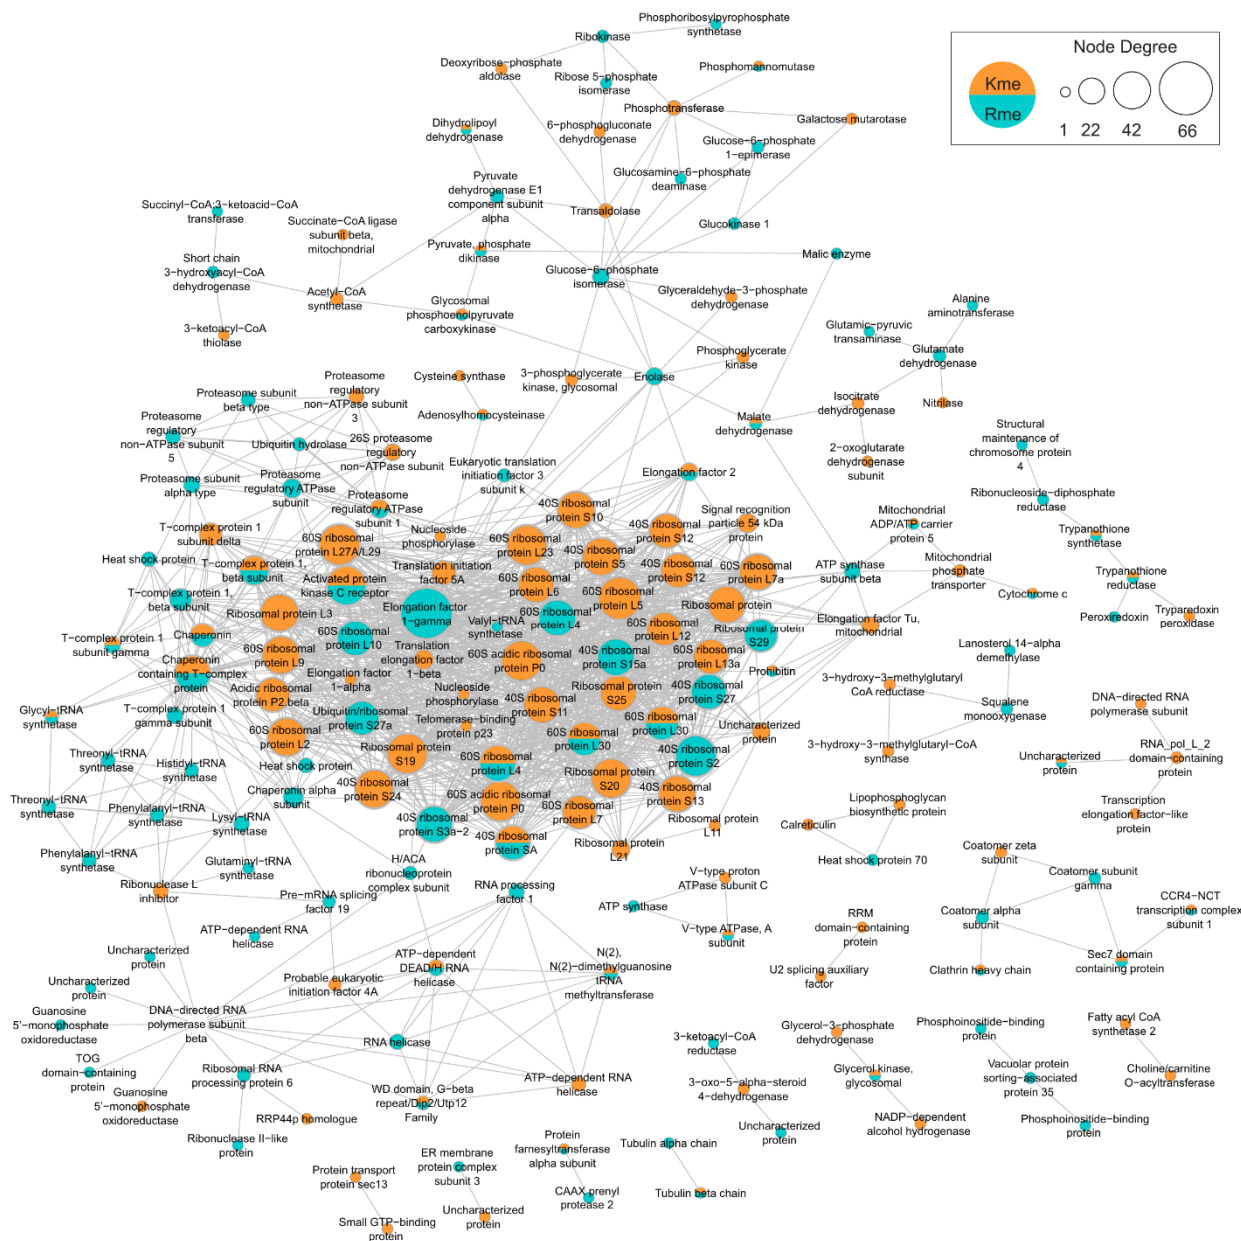

**Figure 7. Interaction network of methylated proteins in *T. cruzi*.** Visualization of functional connection between lysine (K-Me) and arginine (R-Me) methylated proteins. Node degree correspond to number of interactions between proteins. Detailed data are listed in Table S5.

### 3.6 Methylation presents co-occurrence with phosphorylation in *T. cruzi* proteins

To investigate the co-occurrence of methylation and other PTMs, we compared our methylproteome with the phosphoproteome of *T. cruzi* available in the literature. Of the 878 methylated proteins identified in our study, 50 were also found to be phosphorylated in epimastigotes [44], among them there are cytoskeleton proteins, kinases, RNA-binding proteins, calpain cysteine peptidases and hypothetical conserved proteins (Table 3).

**Table 3.** Proteins with co-occurrence of methylation and phosphorylation in *T. cruzi*

| Description                                                      | Uniprot<br>Ids   | Gene<br>Ids                                      | Methylation site<br>(K, R) position | Phosphorylation site<br>(S, T, Y) position                                                   |
|------------------------------------------------------------------|------------------|--------------------------------------------------|-------------------------------------|----------------------------------------------------------------------------------------------|
| calpain cysteine peptidase,<br>putative                          | Q4CPQ6           | Tc00.1047053505985.9                             | R1356                               | S346                                                                                         |
| calpain-like cysteine peptidase,<br>clan CA, family C2, putative | Q4CW64           | Tc00.1047053509003.30                            | K72                                 | S20                                                                                          |
| cysteine peptidase, Clan CA,<br>family C2, putative              | Q4D6J0           | Tc00.1047053506721.30                            | R3348; R3357                        | S970; S1889; T4555                                                                           |
| cysteine peptidase, Clan CA,<br>family C2, putative              | Q4E0D8<br>Q4CL00 | Tc00.1047053508999.190<br>Tc00.1047053510957.9   | K732                                | S822                                                                                         |
| cAMP-specific phosphodiesterase,<br>putative                     | Q4DUD4           | Tc00.1047053506625.80                            | R635; R636                          | S485                                                                                         |
| cytoskeleton-associated protein<br>CAP5.5, putative              | Q4DJS7           | Tc00.1047053509237.130                           | R214                                | S759; S769                                                                                   |
| cytoskeleton associated protein,<br>putative                     | Q4CSI2           | Tc00.1047053506441.20                            | R231; K364                          | S91; T114; S615; Y618;<br>S619; S653; S674;<br>S892; S927; T1053;<br>S1055; S1075            |
| cytoskeleton associated protein,<br>putative                     | Q4DJ92<br>Q4DVF9 | Tc00.1047053511815.170<br>Tc00.1047053506859.170 | R322; K374                          | S427; S428                                                                                   |
| cytoskeleton associated protein,<br>putative                     | Q4DVF8           | Tc00.1047053506859.180                           | R157; K209                          | S14; T21                                                                                     |
| cytoskeleton associated protein,<br>putative                     | Q4D770           | Tc00.1047053508265.100                           | R231; K364                          | S91; T114; S653; S695;<br>S987; S1005; S1132;<br>T1137; S1139; S1150;<br>S1153; S1154; S1159 |
| Dpy-30 motif containing protein,<br>putative                     | Q4CYE7           | Tc00.1047053507629.30                            | R938; R946                          | S767                                                                                         |
| dynein heavy chain, putative                                     | Q4DX29<br>Q4CPP9 | Tc00.1047053508831.4<br>Tc00.1047053508275.9     | K124; R126;<br>K131                 | S483                                                                                         |
| eukaryotic initiation factor 5a,<br>putative                     | Q4E4N4           | Tc00.1047053506925.120<br>Tc00.1047053506925.130 | K42                                 | S2                                                                                           |
| flagellum targeting protein<br>kharon1, putative (fragment)      | Q4DNH8           | Tc00.1047053509791.189                           | R146                                | S77; S79                                                                                     |
| flagellum targeting protein<br>kharon1, putative                 | Q4D3F7           | Tc00.1047053508719.70                            | K146                                | S77; S79; S276; S332;<br>S344; S381                                                          |
| Gem-associated protein 2, putative                               | Q4D0P8<br>Q4D4R7 | Tc00.1047053510301.40<br>Tc00.1047053504163.70   | K305; K313                          | S97; S99                                                                                     |

|                                                        |        |                        |                  |                                                    |
|--------------------------------------------------------|--------|------------------------|------------------|----------------------------------------------------|
| heterogeneous nuclear ribonucleoprotein H/F, putative  | Q4DGN8 | Tc00.1047053504157.10  | K147             | S123; S125; T126; T128; S339                       |
|                                                        | Q4DFM4 | Tc00.1047053511109.130 |                  |                                                    |
| leucine rich repeat protein, putative                  | Q4E246 | Tc00.1047053508707.310 | R512; K548; K632 | S898; S906; S910                                   |
| Mitochondrial import receptor subunit ATOM69, putative | Q4D015 | Tc00.1047053511803.40  | K89              | S502; T505                                         |
| p25-alpha, putative                                    | Q4CVJ1 | Tc00.1047053504199.20  | R96              | S128; S130; S132                                   |
|                                                        | Q4DIP8 | Tc00.1047053506635.130 |                  |                                                    |
| phosphoprotein phosphatase, putative                   | Q4DDM9 | Tc00.1047053507601.10  | K625             | S5; S8; S9; S270; T272                             |
| prostaglandin F2alpha synthase                         | Q4E4V7 | Tc00.1047053508461.80  | R9               | S215                                               |
|                                                        | Q4CNI1 | Tc00.1047053507617.9   |                  |                                                    |
| protein kinase A catalytic subunit isoform 2, putative | Q4E4T3 | Tc00.1047053508461.280 | K18; K160        | T174; T230                                         |
| protein kinase, putative                               | Q4D5A8 | Tc00.1047053511633.70  | R387; R389       | S318; S319; S322                                   |
| protein associated with differentiation 8, putative    | Q4DZJ0 | Tc00.1047053508799.270 | R412             | T588                                               |
|                                                        | Q4CUG0 | Tc00.1047053509713.10  |                  |                                                    |
|                                                        | Q4DZI9 | Tc00.1047053508799.280 | R401             |                                                    |
| Putative intraflagellar transport protein A1           | Q4CP52 | Tc00.1047053503539.20  | R4; R7           | S362; S363; S365; S436; S441; S442; S445; Y447     |
| pyruvate phosphate dikinase, putative                  | Q4E0Q0 | Tc00.1047053506297.190 | R365; R587; K871 | T481; S482; S680                                   |
|                                                        | Q4E3P5 | Tc00.1047053510101.140 |                  |                                                    |
| retrotransposon hot spot (RHS) protein, putative       | Q4E3H4 | Tc00.1047053507611.10  | K553             | S32; S34; T36                                      |
| RNA guanylyltransferase, putative                      | Q4D3H7 | Tc00.1047053507511.30  | K445             | S30; S34                                           |
| RNA-binding protein, putative                          | Q4E5D6 | Tc00.1047053511277.580 | R8; R251         | S302; S304; S307; S308; S412; S414                 |
| RNA-binding protein, putative                          | Q4D7Y1 | Tc00.1047053510755.120 | R213             | S7; S9; S188                                       |
|                                                        | Q4D3A9 | Tc00.1047053508413.50  |                  |                                                    |
| RNA-binding protein, putative                          | Q4D488 | Tc00.1047053509317.60  | R36              | S375; S377; S379                                   |
|                                                        | Q4DT61 | Tc00.1047053511621.50  |                  |                                                    |
| RNA-editing-associated protein 1, putative             | Q4DZM3 | Tc00.1047053504147.224 | K362; K375       | S188; S189; S193; S194                             |
| sterol 24-c-methyltransferase, putative                | Q4CLW8 | Tc00.1047053505683.10  | R91              | S235                                               |
|                                                        | Q4CMB7 | Tc00.1047053504191.10  |                  |                                                    |
|                                                        | Q4CM63 | Tc00.1047053510185.10  |                  |                                                    |
| tyrosine aminotransferase                              | Q4CVI0 | Tc00.1047053510795.10  | K60; R196        | S77                                                |
|                                                        | Q4E4E7 | Tc00.1047053510187.30  |                  |                                                    |
|                                                        |        | Tc00.1047053510187.40  |                  |                                                    |
| ubiquitin hydrolase, putative                          | Q4DG39 | Tc00.1047053510761.70  | R540; K544       | S947; S949; S952; T955; S956                       |
| hypothetical protein                                   | Q4DWC8 | Tc00.1047053509733.60  | R8               | S10; S13; S144; Y146; T183; S185; S248; S402; S411 |
| hypothetical protein, conserved                        | Q4CYL3 | Tc00.1047053504423.30  | K308; R408       | S57; S618; T622; S813                              |
| hypothetical protein, conserved                        | Q4D0U3 | Tc00.1047053508051.20  | R1419            | S256; S260; T263; S265; S266; S267; S1403; S1406   |
| hypothetical protein, conserved                        | Q4DRF1 | Tc00.1047053508547.160 | K756; K760       | S15; S81; T83                                      |

|                                 |        |                        |                     |                                                |
|---------------------------------|--------|------------------------|---------------------|------------------------------------------------|
| hypothetical protein, conserved | Q4DIU6 | Tc00.1047053511389.50  | R237; R239          | T221                                           |
| hypothetical protein, conserved | Q4DPA5 | Tc00.1047053509647.130 | K7; R9              | S91; S95                                       |
| hypothetical protein, conserved | Q4CTC8 | Tc00.1047053507569.10  | R266; K308;<br>R408 | S57; S241; T246; S618;<br>T622; S810           |
| hypothetical protein, conserved | Q4DG58 | Tc00.1047053511693.20  | R200                | S90; S92                                       |
| hypothetical protein, conserved | Q4E2Q5 | Tc00.1047053504153.280 | R171                | S366; S370                                     |
| hypothetical protein, conserved | Q4D2L5 | Tc00.1047053511435.40  | R115; R118;<br>R126 | S88; T90; S91; S305;<br>S311; S352; S355; S359 |
| hypothetical protein, conserved | Q4D442 | Tc00.1047053510733.50  | K70; K77            | S484                                           |
| hypothetical protein, conserved | Q4CWG6 | Tc00.1047053508145.49  | R4; R8              | S1788; S1792; S1793;<br>S1796                  |
|                                 | Q4D106 | Tc00.1047053504243.30  |                     |                                                |
| hypothetical protein, conserved | Q4CY87 | Tc00.1047053510001.20  | R507; K508          | S17; S21; S48; S51;<br>S56; S497; S502         |
|                                 | Q4D238 | Tc00.1047053507529.20  |                     |                                                |
| hypothetical protein, conserved | Q4E5E4 | Tc00.1047053511277.490 | R7; R10             | S186; S189                                     |
|                                 | Q4E1X3 | Tc00.1047053507993.40  |                     |                                                |

In order to better evaluate which pathways and processes are related to the proteins that present co-occurrence of methylation and phosphorylation, we performed a functional clustering analysis based on the annotations in the INTERPRO, SMART, GO and KEGG databases, using the DAVID [38] tools. The analysis identified three enriched functional clusters (Table S6). In the first cluster there are proteins involved in RNA binding and belong to family proteins with RNA recognition motifs (RRM), the second cluster groups proteins related to sterol methyltransferase activity and the third one represents proteins with cysteine peptidase activity.

#### 4. Discussion

PTMs can be found across the entire cell and are involved in various processes in eukaryotes [45]. Nonetheless, in trypanosomes only a few large-scale studies have been conducted to elucidate the global impact of PTMs at the cellular level, mainly for phosphorylation [44,46–50] and acetylation [51]. Methylproteome characterization studies have generally analyzed methylation in arginine (R) and lysine (K) separately and different processes have been identified impacted by the modification in these different residues. To date, while R-methylated proteins are involved in RNA processing, transcriptional regulation and repair of DNA damage, K-methylation has been extensively described in many histone residues,

playing a role in the regulation of chromatin compaction and gene transcription. In our work we characterize methylation in both residues and reported the first large-scale analysis of lysine and arginine methylation of *T. cruzi* proteins.

Our data shows that different types of protein methylation is widely found in *T. cruzi*, were identified monomethylated, dimethylated and trimethylated proteins. These methylated proteins are located in different cell compartments and present a wide range of functions, suggesting an influence of the methylation in several biological processes of the parasite, including metabolism, oxireduction, protein folding, and RNA metabolism, were identified here, for the first time, in large-scale.

Under the conditions applied in this study, arginine and lysine methylation occurred almost in equal abundance in the substrates, however the biological processes that impact on *T. cruzi* are different.

Arginine-methylated proteins are involved in several processes, in particular, oxireduction and carbohydrate metabolism, whereas lysine-methylated proteins are mainly involved in the protein synthesis.

This last one is fundamental to differential gene regulation processes in trypanosomes. Due the post transcriptional events regulating the gene expression in *T. cruzi* and others trypanosomatids, the presence of RNA binding proteins is even more crucial. RNA binding proteins are known substrates of PRMT in different organisms [19,27,52–54]. We identified proteins involved in RNA processing with methylsites and, analyzing data previously reported, these proteins also have phosphosites. In *T. brucei*, Lott and colleagues [27] also reported RNA processing having identified only arginine methylated proteins in *T. brucei* procyclic form, while the main represented function was proteins associated with cytoskeleton and locomotion. Here, the main function represented by the majority of methylated proteins identified was protein synthesis, and, interestingly, mainly in lysine methylated proteins. Indeed, the same PTM can affect different processes in the cell, thereby this dissimilarity can be explained by the differences in parasite's biology in a PTM level. For example, recently, Schenkman et al. [51] analyzing lysine acetylation in trypanosomes, revealed that protein acetylation is involved in very distinct set of acetylated proteins when comparing *T. cruzi* and *T. brucei*. Therefore, these functional differences between methylproteomes (and acetylomes) is compatible to the broad role of PTMs in cell signaling already demonstrated in other eukaryotes and that seems to also exist between trypanosomes.

Methylated proteins also impact important process like RNA processing, that is responsible for direct assembly of multiprotein complexes on primary transcripts, mature mRNAs, and stable ribonucleoprotein components of the RNA processing machinery [55]. Recently, Amorim and colleagues [49] demonstrated that EF-1- $\alpha$  and EF-2 are phosphorylated in *T. cruzi* during the final phase of metacyclogenesis. This demonstrates that different post-translational modifications are present and may be regulating different forms of *T. cruzi* throughout their life cycle as a response to environment changes. Here, we identified 9 proteins methylated in *translation elongation factor activity* GO-MF, among them elongation factor 1-alpha (EF-1- $\alpha$ ) (Tc00.1047053511367.360), elongation factor 1-gamma (EF-1-gamma) (Tc00.1047053510163.20), elongation factor 2 (EF-2) (Tc00.1047053508169.20) and transcription elongation factor-like protein (Tc00.1047053507715.30). These elongation factors are key pieces of translation process and, especially EF-1- $\alpha$ , may act beyond the canonical process in eukaryotes, including in *T. cruzi* [56] and therefore can be potential drug targets, such as EF-2 in *P. falciparum* [57].

Other important class of protein is kinases, that are key mediators of signal transduction and we detected methylsites in 18 proteins annotated with kinase function, among them *serine/threonine* and *protein kinase activity* classes with 11 and 7 proteins, respectively (Table S3). Interestingly, 3 of proteins related to kinases identified here (Q4E2T4, Q4D9W8 and Q4CXF6) present GO related to transmembrane and integral component of membrane. An *in silico* approach also found kinases with annotation of a transmembrane domain in *T. brucei*, suggesting that kinases, if located on the surface of trypanosomatids, can phosphorylate host molecules or parasites to modify its environment [58].

Our analysis of amino acids patterns surrounding methylation sites reveal different residues in K-Me and R-Me (Fig. 3). The vicinity of lysine methylated sites are enriched for glutamic acids (E/Glu), something also seen in *P. falciparum* [22] and *Giardia duodenalis* [23] and arginine methylated sites are enriched upstream for arginine (R/Arg) and downstream for methionine (M/Met). Well-defined patterns of amino acids, such "RGG", are not always surrounding targets of PRMTs [59] and, likewise, are not always defined for PKMT [18]. Our data for *T. cruzi* reinforces that the writers target motifs seems to be broader in methyl-arginine and for methyl-lysine the motifs seem to carry a certain ancestry of older eukaryotes.

Another important aspect of PTMs in cell signaling is the crosstalk [45]. Different PTMs can occur in a same protein at any given time, the incredible dynamic changes of this allows a synergistic or antagonistic action, because depending on their combination, the crosstalk between these different modifications triggers other functions in the protein, affecting their interactions with other molecules [60]. Since the code

of combinations between PTMs has been proposed [61] the crosstalk among the modifications has been uncovered, mainly through the mass spectrometry-based proteomics [62]. It is known, for example, that arginine methylation affects other methylated residues, such as lysines themselves, and other modifications such as acetylation and phosphorylation [52]. In addition, there is an interrelationship between the methylation of lysines 4 and 79 of histone H3 (H3K4 and H3K79) with the ubiquitination of lysine 123 of histone H2B (H2BK123) in *Saccharomyces cerevisiae*, where the non-ubiquitination of K123 prevents methylation of K4 and K79 [63]. There is also antagonism between arginine methylation and serine phosphorylation in the C-terminal domain of RNA polymerase II, which impacts the transcription of specific genes in mammals [64]. Among the effects of lysine methylation and interaction with phosphorylation, crosstalk between lysine 810 (K810) methylation in retinoblastoma tumor suppressor protein, that preventing recognition by a cyclin-dependent kinase (Cdk) in serine residue, does not allow the phosphorylation of this substrate, controlling the progression of the cell cycle [65].

We found sites of methylation and phosphorylation in 50 proteins when compared with data from the *T. cruzi* phosphoproteome, suggesting the occurrence of different types of PTMs even in non-histone proteins, this leads to believe that there is a potential crosstalk between these modifications working to adjust the function of the protein. Although the methylation and phosphorylation sites are not so close in the primary sequence (Table 3) they may be close within the tertiary structure of the protein and together influence the interaction with other binding molecules or they may be further away to prevent interference, so that modifying enzymes can independently bind to the respective sites [66]. Our functional clusterization analysis of proteins with methylation and phosphorylation sites grouped with highest stringency three clusters related to RNA binding proteins, sterol methyltransferase activity and calpain peptidases (Table S6). Related to first cluster the presence of proteins methylated involved with RNA metabolism is commonly reported and in *T. brucei* where was identified 10 protein with RRM [27], the proteins identified in *T. cruzi* are all arginine-methylated proteins. These proteins interact with RNA typically through aromatic residues within the RNP1 and RNP2 domains located on conserved  $\beta$ -sheets and are directly involved in RNA processing [55,67]. In this regard, the methylation typically impacts mainly the protein-protein interaction and subcellular localization, but does not directly impact protein-RNA interactions. On the other hand, with phosphorylation site occurring in the same protein, the protein function or recruitment could be, perhaps, modified. The second cluster have proteins with sterol methyltransferase activity, these enzymes are involved in the ergosterol and related 24-alkyl sterols

metabolism. The steroid biosynthesis is a target of inhibitors for the treatment of both Chagas's disease and leishmaniasis [68,69]. The third cluster have proteins from the family of calpains, which is an intracellular protease involved in many cellular functions that are regulated by calcium. Our results of methylproteome and the analysis of previously phosphoproteome data of *T. cruzi* provide candidates to study of potential crosstalk between methylation and phosphorylation in *T. cruzi*. Further characterization is necessary to identify such crosstalk, for example through protein interaction assays, to identify partners linking the specific sites of methylation and phosphorylation [70].

## 5. Conclusion

Collectively, our data gave another status for protein methylation in the biology of *T. cruzi* and indicate that it has great potential to be at the level of other PTMs, such acetylation and phosphorylation, acting in the cell regulation. Finally, our data show that important processes are being regulated by protein methylation in *T. cruzi* and that this modification should be further investigated, in order to reveal key parts in the biology of this parasite and potential chemotherapeutic candidates.

## Declaration of Competing Interest

The authors declare that they have no known competing financial interests or personal relationships that could have appeared to influence the work reported in this paper.

## Acknowledgments

The authors thank Fiocruz for using the Technological Platforms Network. Also thank CNPQ, CAPES and Fiocruz for financial support.

## References

- [1] T.M. Karve, A.K. Cheema, Small Changes Huge Impact: The Role of Protein Posttranslational Modifications in Cellular Homeostasis and Disease, *J. Amino Acids*. 2011 (2011) 1–13. <https://doi.org/10.4061/2011/207691>.
- [2] W.K. Paik, D.C. Paik, S. Kim, Historical review: the field of protein methylation, *Trends Biochem. Sci.* 32 (2007) 146–152. <https://doi.org/10.1016/j.tibs.2007.01.006>.
- [3] W.K. Paik, S. Kim, Protein methylation, *Science*. 174 (1971) 114–9. [https://doi.org/10.1016/0955-0674\(93\)90080-A](https://doi.org/10.1016/0955-0674(93)90080-A).
- [4] J. Murn, Y. Shi, The winding path of protein methylation research: milestones and new frontiers, *Nat. Rev. Mol. Cell Biol.* 18 (2017) 517–527. <https://doi.org/10.1038/nrm.2017.35>.
- [5] P.A. Boriack-Sjodin, K.K. Swinger, Protein methyltransferases: A distinct, diverse and dynamic family of enzymes, *Biochemistry*. 55 (2016) 1557–1569. <https://doi.org/10.1021/acs.biochem.5b01129>.
- [6] Y. Morales, T. Cáceres, K. May, J.M. Hevel, Biochemistry and regulation of the protein arginine methyltransferases (PRMTs), *Arch. Biochem. Biophys.* 590 (2016) 138–152. <https://doi.org/10.1016/j.abb.2015.11.030>.
- [7] K.K. Biggar, S.S.-C. Li, Non-histone protein methylation as a regulator of cellular signalling and function, *Nat. Rev. Mol. Cell Biol.* 16 (2014) 5–17. <https://doi.org/10.1038/nrm3915>.
- [8] X. Li, C. Wang, H. Jiang, C. Luo, A patent review of arginine methyltransferase inhibitors (2010–2018), *Expert Opin. Ther. Pat.* 29 (2019) 97–114. <https://doi.org/10.1080/13543776.2019.1567711>.
- [9] C. Chagas, Nova tripanozomíase humana: estudos sobre a morfologia e o ciclo evolutivo do *Schizotrypanum cruzi* n. gen., n. sp., agente etiológico de nova entidade morbida do homem, *Mem. Inst. Oswaldo Cruz*. 1 (1909) 159–218. <https://doi.org/10.1590/S0074-02761909000200008>.
- [10] WHO, American Trypanosomiasis (Chagas Disease), WHO (World Heal. Organ. (2019). [http://www.who.int/en/news-room/fact-sheets/detail/chagas-disease-\(american-trypanosomiasis\)](http://www.who.int/en/news-room/fact-sheets/detail/chagas-disease-(american-trypanosomiasis)).
- [11] B.Y. Lee, K.M. Bacon, M.E. Bottazzi, P.J. Hotez, Global economic burden of Chagas disease: a computational simulation model, *Lancet Infect. Dis.* 13 (2013) 342–348. [https://doi.org/10.1016/S1473-3099\(13\)70002-1](https://doi.org/10.1016/S1473-3099(13)70002-1).
- [12] S.M. Bartsch, C.M. Avelis, L. Asti, D.L. Hertenstein, M. Ndeffo-Mbah, A. Galvani, B.Y. Lee, The economic value of identifying and treating Chagas disease patients earlier and the impact on *Trypanosoma cruzi* transmission, *PLoS Negl. Trop. Dis.* 12 (2018) e0006809. <https://doi.org/10.1371/journal.pntd.0006809>.
- [13] J.A. Pérez-Molina, I. Molina, Chagas disease, *Lancet*. 391 (2018) 82–94. [https://doi.org/10.1016/S0140-6736\(17\)31612-4](https://doi.org/10.1016/S0140-6736(17)31612-4).
- [14] S.C. Larsen, K.B. Sylvestersen, A. Mund, D. Lyon, M. Mullari, M. V Madsen, J.A. Daniel, L.J. Jensen, M.L. Nielsen, Proteome-wide analysis of arginine monomethylation reveals widespread occurrence in human cells, *Sci. Signal.* 9 (2016) 1–15. <https://doi.org/10.1126/scisignal.aaf7329>.
- [15] S. Lanouette, V. Mongeon, D. Figeys, J. Couture, The functional diversity of protein lysine

methylation, *Mol. Syst. Biol.* 10 (2014) 724. <https://doi.org/10.1002/msb.134974>.

[16] J.K.K. Low, M.R. Wilkins, Protein arginine methylation in *Saccharomyces cerevisiae*, *FEBS J.* 279 (2012) 4423–4443. <https://doi.org/10.1111/febs.12039>.

[17] K. Wang, Y.J. Zhou, H. Liu, K. Cheng, J. Mao, F. Wang, W. Liu, M. Ye, Z.K. Zhao, H. Zou, Proteomic analysis of protein methylation in the yeast *Saccharomyces cerevisiae*, *J. Proteomics.* 114 (2015) 226–33. <https://doi.org/10.1016/j.jprot.2014.07.032>.

[18] M. Bremang, A. Cuomo, A.M. Agresta, M. Stugiewicz, V. Spadotto, T. Bonaldi, Mass spectrometry-based identification and characterisation of lysine and arginine methylation in the human proteome, *Mol. Biosyst.* 9 (2013) 2231. <https://doi.org/10.1039/c3mb00009e>.

[19] T. Uhlmann, V.L. Geoghegan, B. Thomas, G. Ridlova, D.C. Trudgian, O. Acuto, A Method for Large-scale Identification of Protein Arginine Methylation, *Mol. Cell. Proteomics.* 11 (2012) 1489–1499. <https://doi.org/10.1074/mcp.M112.020743>.

[20] X. Cao, A.M. Arnaudo, B.A. Garcia, Large-scale global identification of protein lysine methylation in vivo, *Epigenetics.* 8 (2013) 477–485. <https://doi.org/10.4161/epi.24547>.

[21] M. Zeeshan, I. Kaur, J. Joy, E. Saini, G. Paul, A. Kaushik, S. Dabral, A. Mohammed, D. Gupta, P. Malhotra, Proteomic Identification and Analysis of Arginine-Methylated Proteins of *Plasmodium falciparum* at Asexual Blood Stages, *J. Proteome Res.* 16 (2017) 368–383. <https://doi.org/10.1021/acs.jproteome.5b01052>.

[22] I. Kaur, M. Zeeshan, E. Saini, A. Kaushik, A. Mohammed, D. Gupta, P. Malhotra, Widespread occurrence of lysine methylation in *Plasmodium falciparum* proteins at asexual blood stages, *Sci. Rep.* 6 (2016) 1–24. <https://doi.org/10.1038/srep35432>.

[23] S.J. Emery-Corbin, J.J. Hamey, B.R.E. Ansell, B. Balan, S. Tichkule, A.J. Stroehlein, C. Cooper, B. V McInerney, S. Hediye-Zadeh, D. Vuong, A. Crombie, E. Lacey, M.J. Davis, M.R. Wilkins, M. Bahlo, S.G. Svärd, R.B. Gasser, A.R. Jex, Eukaryote-Conserved Methylarginine Is Absent in Diplomonads and Functionally Compensated in *Giardia*, *Mol. Biol. Evol.* (2020). <https://doi.org/10.1093/molbev/msaa186>.

[24] D. Rosenzweig, D. Smith, P.J. Myler, R.W. Olafson, D. Zilberstein, Post-translational modification of cellular proteins during *Leishmania donovani* differentiation, *Proteomics.* 8 (2008) 1843–1850. <https://doi.org/10.1002/pmic.200701043>.

[25] T.R. Ferreira, A.A. Dowle, E. Parry, E.V.C. Alves-ferreira, K. Hogg, F. Kolokousi, T.R. Larson, M.J. Plevin, A.K. Cruz, P.B. Walrad, PRMT7 regulates RNA-binding capacity and protein stability in *Leishmania* parasites, *Nucleic Acids Res.* 48 (2020) 5511–5526. <https://doi.org/10.1093/nar/gkaa211>.

[26] J.C. Fisk, J. Li, H. Wang, J.M. Aletta, J. Qu, L.K. Read, Proteomic Analysis Reveals Diverse Classes of Arginine Methylproteins in Mitochondria of trypanosomes, *Mol. Cell. Proteomics.* (2013) 302–311. <https://doi.org/10.1074/mcp.M112.022533>.

[27] K. Lott, J. Li, J.C. Fisk, H. Wang, J.M. Aletta, J. Qu, L.K. Read, Global proteomic analysis in trypanosomes reveals unique proteins and conserved cellular processes impacted by arginine methylation., *J. Proteomics.* 91 (2013) 210–25. <https://doi.org/10.1016/j.jprot.2013.07.010>.

[28] E.P. Camargo, Growth and differentiation in *Trypanosoma cruzi*. I. Origin of metacyclic trypanosomes in liquid media, *Rev Inst Med Trop São Paulo.* 6 (1964) 93–100. <http://www.imtsp.fm.usp.br/portal/portal/images/pdf/revista/vol06/93-100.pdf>.

[29] A. Shevchenko, H. Tomas, J. Havlis, J. V Olsen, M. Mann, In-gel digestion for mass spectrometric characterization of proteins and proteomes, *Nat. Protoc.* 1 (2006) 2856–2860. <https://doi.org/10.1038/nprot.2006.468>.

- 560 [30] J. Rappsilber, M. Mann, Y. Ishihama, Protocol for micro-purification, enrichment, pre-fractionation  
561 and storage of peptides for proteomics using StageTips., *Nat. Protoc.* 2 (2007) 1896–1906.  
562 <https://doi.org/10.1038/nprot.2007.261>.
- 563 [31] J. V Olsen, L.M.F. De Godoy, G. Li, B. Macek, P. Mortensen, R. Pesch, A. Makarov, O. Lange, S.  
564 Horning, M. Mann, Parts per Million Mass Accuracy on an Orbitrap Mass Spectrometer via Lock  
565 Mass Injection into a C-trap, *Mol. Cell. Proteomics.* (2005) 2010–2021.  
566 <https://doi.org/10.1074/mcp.T500030-MCP200>.
- 567 [32] H. Hahne, F. Pachi, B. Ruprecht, S.K. Maier, S. Klaeger, D. Helm, G. Médard, M. Wilm, S. Lemeer,  
568 B. Kuster, DMSO enhances electrospray response, boosting sensitivity of proteomic experiments,  
569 *Nat. Methods.* 10 (2013) 989–991. <https://doi.org/10.1038/nmeth.2610>.
- 570 [33] J. Cox, M. Mann, MaxQuant enables high peptide identification rates, individualized p.p.b.-range  
571 mass accuracies and proteome-wide protein quantification., *Nat. Biotechnol.* 26 (2008) 1367–1372.  
572 <https://doi.org/10.1038/nbt.1511>.
- 573 [34] M. Ashburner, C.A. Ball, J.A. Blake, D. Botstein, H. Butler, J.M. Cherry, A.P. Davis, K. Dolinski,  
574 S.S. Dwight, J.T. Eppig, M.A. Harris, D.P. Hill, L. Issel-Tarver, A. Kasarskis, S. Lewis, J.C. Matese,  
575 J.E. Richardson, M. Ringwald, G.M. Rubin, G. Sherlock, Gene Ontology: tool for the unification of  
576 biology, *Nat. Genet.* 25 (2000) 25–29.
- 577 [35] R.L. Tatusov, N.D. Fedorova, J.D. Jackson, A.R. Jacobs, B. Kiryutin, E. V Koonin, D.M. Krylov, R.  
578 Mazumder, S.L. Mekhedov, A.N. Nikolskaya, B.S. Rao, S. Smirnov, A. V Sverdlov, S. Vasudevan,  
579 Y.I. Wolf, J.J. Yin, D.A. Natale, The COG database: an updated version includes eukaryotes, *BMC*  
580 *Bioinformatics.* 14 (2003) 1–14. <https://doi.org/10.1186/1471-2105-4-41>.
- 581 [36] M. Kanehisa, S. Goto, KEGG: Kyoto Encyclopedia of Genes and Genomes, *Nucleic Acids Res.* 28  
582 (2000) 27–30. <https://doi.org/10.1093/nar/28.1.27>.
- 583 [37] D.W. Huang, B.T. Sherman, R.A. Lempicki, Bioinformatics enrichment tools: Paths toward the  
584 comprehensive functional analysis of large gene lists, *Nucleic Acids Res.* 37 (2009) 1–13.  
585 <https://doi.org/10.1093/nar/gkn923>.
- 586 [38] D.W. Huang, B.T. Sherman, R.A. Lempicki, Systematic and integrative analysis of large gene lists  
587 using DAVID bioinformatics resources, *Nat. Protoc.* 4 (2009) 44–57.  
588 <https://doi.org/10.1038/nprot.2008.211>.
- 589 [39] Y. Benjamini, Y. Hochberg, Controlling the False Discovery Rate: A Practical and Powerful  
590 Approach to Multiple Testing, *J. R. Stat. Soc.* 57 (1995) 289–300. <https://doi.org/10.2307/2346101>.
- 591 [40] N. Colaert, K. Helsens, L. Martens, J. Vandekerckhove, K. Gevaert, Improved visualization of  
592 protein consensus sequences by iceLogo, *Nat. Methods.* 6 (2009) 786–787.  
593 <https://doi.org/10.1038/nmeth1109-786>.
- 594 [41] D. Szklarczyk, A.L. Gable, D. Lyon, A. Junge, S. Wyder, J. Huerta-cepas, M. Simonovic, N.T.  
595 Doncheva, J.H. Morris, P. Bork, L.J. Jensen, C. Von Mering, STRING v11: protein-protein  
596 association networks with increased coverage, supporting functional discovery in genome-wide  
597 experimental datasets, *Nucleic Acids Res.* 47 (2019) 607–613.  
598 <https://doi.org/10.1093/nar/gky1131>.
- 599 [42] P. Shannon, A. Markiel, O. Ozier, N.S. Baliga, J.T. Wang, D. Ramage, N. Amin, B. Schwikowski, T.  
600 Ideker, Cytoscape: A Software Environment for Integrated Models of Biomolecular Interaction  
601 Networks, *Genome Res.* 13 (2003) 2498–2504. <https://doi.org/10.1101/gr.1239303>.
- 602 [43] J. V Olsen, B. Blagoev, F. Gnäd, B. Macek, C. Kumar, P. Mortensen, M. Mann, Global, In Vivo,  
603 and Site-Specific Phosphorylation Dynamics in Signaling Networks, *Cell.* 127 (2006) 635–648.  
604 <https://doi.org/10.1016/j.cell.2006.09.026>.
- 605 [44] F.K. Marchini, L.M.F. De Godoy, R.C.P. Rampazzo, D.P. Pavoni, M. Christian, F. Gnäd, M. Mann,

606 M.A. Krieger, Profiling the *Trypanosoma cruzi* Phosphoproteome, PLoS One. 6 (2011).  
607 <https://doi.org/10.1371/journal.pone.0025381>.

608 [45] P. Minguéz, L. Parca, F. Diella, D.R. Mende, R. Kumar, M. Helmer-Citterich, A.-C. Gavin, V. Van  
609 Noort, P. Bork, Deciphering a global network of functionally associated post-translational  
610 modifications, Mol. Syst. Biol. 8 (2012) 1–14. <https://doi.org/10.1038/msb.2012.31>.

611 [46] M.D. Urbaniak, D.M. a Martin, M. a J. Ferguson, Global quantitative SILAC phosphoproteomics  
612 reveals differential phosphorylation is widespread between the procyclic and bloodstream form  
613 lifecycle stages of *Trypanosoma brucei*, J. Proteome Res. 12 (2013) 2233–2244.  
614 <https://doi.org/10.1021/pr400086y>.

615 [47] I.R.E. Nett, D.M. a Martin, D. Miranda-Saavedra, D. Lamont, J.D. Barber, A. Mehlert, M. a J.  
616 Ferguson, The phosphoproteome of bloodstream form *Trypanosoma brucei*, causative agent of  
617 African sleeping sickness., Mol. Cell. Proteomics. 8 (2009) 1527–38.  
618 <https://doi.org/10.1074/mcp.M800556-MCP200>.

619 [48] E.S. Nakayasu, M.R. Gaynor, T.J.P. Sobreira, J.A. Ross, I.C. Almeida, Phosphoproteomic analysis  
620 of the human pathogen *Trypanosoma cruzi* at the epimastigote stage, Proteomics. 9 (2009) 3489–  
621 3506. <https://doi.org/10.1002/pmic.200800874>.

622 [49] J.C. Amorim, M. Batista, E.S. Cunha, A.C.R. Lucena, C. V De Paula Lima, K. Sousa, M.A. Krieger,  
623 F.K. Marchini, Quantitative proteome and phosphoproteome analyses highlight the adherent  
624 population during *Trypanosoma cruzi* metacyclogenesis, Sci. Rep. 7 (2017) 1–12.  
625 <https://doi.org/10.1038/s41598-017-10292-3>.

626 [50] A.C.R. Lucena, J.C. Amorim, C.V. de Paula Lima, M. Batista, M.A. Krieger, L.M.F. de Godoy, F.K.  
627 Marchini, Quantitative phosphoproteome and proteome analyses emphasize the influence of  
628 phosphorylation events during the nutritional stress of *Trypanosoma cruzi*: the initial moments of in  
629 vitro metacyclogenesis, Cell Stress Chaperones. 24 (2019) 927–936.  
630 <https://doi.org/10.1007/s12192-019-01018-7>.

631 [51] N.S. Moretti, I. Cestari, A. Anupama, K. Stuart, S. Schenkman, Comparative Proteomic Analysis of  
632 Lysine Acetylation in Trypanosomes, J. Proteome Res. 17 (2018) 374–385.  
633 <https://doi.org/10.1021/acs.jproteome.7b00603>.

634 [52] M.T. Bedford, S.G. Clarke, Protein arginine methylation in mammals: who, what, and why., Mol.  
635 Cell. 33 (2009) 1–13. <https://doi.org/10.1016/j.molcel.2008.12.013>.

636 [53] Boisvert, A Proteomic Analysis of Arginine-methylated Protein Complexes, Mol. Cell. Proteomics.  
637 (2003) 1319–1330. <https://doi.org/10.1074/mcp.M300088-MCP200>.

638 [54] E. Blackwell, S. Ceman, Arginine methylation of RNA-binding proteins regulates cell function and  
639 differentiation, Mol. Reprod. Dev. 79 (2012) 163–175. <https://doi.org/10.1002/mrd.22024>.

640 [55] G. Varani, K. Nagai, RNA recognition by RNP proteins during RNA processing, Annu. Rev.  
641 Biophys. Biomol. Struct. 27 (1998) 407–445. <https://doi.org/10.1146/annurev.biophys.27.1.407>.

642 [56] L.R. Alves, C. Oliveira, S. Goldenberg, Eukaryotic translation elongation factor-1 alpha is  
643 associated with a specific subset of mRNAs in *Trypanosoma cruzi*, BMC Microbiol. 15 (2015) 1–9.  
644 <https://doi.org/10.1186/s12866-015-0436-2>.

645 [57] A.N. Cowell, E.A. Winzeler, Advances in omics-based methods to identify novel targets for malaria  
646 and other parasitic protozoan infections, Genome Med. 11 (2019) 1–17.  
647 <https://doi.org/https://doi.org/10.1186/s13073-019-0673-3>.

648 [58] M. Parsons, E.A. Worthey, P.N. Ward, J.C. Mottram, Comparative analysis of the kinomes of three  
649 pathogenic trypanosomatids: *Leishmania major*, *Trypanosoma brucei* and *Trypanosoma cruzi*,  
650 BMC Genomics. 6 (2005) 1–19. <https://doi.org/10.1186/1471-2164-6-127>.

- 651 [59] W.L. Wooderchak, T. Zang, Z.S. Zhou, M. Acuña, S.M. Tahara, J.M. Hevel, Substrate Profiling of  
652 PRMT1 Reveals Amino Acid Sequences That Extend Beyond the “RGG” Paradigm, *Biochemistry*.  
653 47 (2008) 9456–9466. <https://doi.org/10.1021/bi800984s>.
- 654 [60] A.S. Venne, L. Kollipara, R.P. Zahedi, The next level of complexity: Crosstalk of posttranslational  
655 modifications, *Proteomics*. 14 (2014) 513–524. <https://doi.org/10.1002/pmic.201300344>.
- 656 [61] B.D. Strahl, C.D. Allis, The language of covalent histone modifications, *Nature*. 403 (2000) 41–45.  
657 <https://doi.org/10.1038/47412>.
- 658 [62] J. V Olsen, M. Mann, Status of large-scale analysis of post-translational modifications by mass  
659 spectrometry, *Mol. Cell. Proteomics*. 12 (2013) 3444–52.  
660 <https://doi.org/10.1074/mcp.O113.034181>.
- 661 [63] Z. Farooq, S. Banday, T.K. Pandita, M. Altaf, The many faces of histone H3K79 methylation,  
662 *Mutat. Res. Rev. Mutat. Res.* 6 (2016) 356–372. <https://doi.org/10.1016/j.mrrev.2016.03.005>.
- 663 [64] R.J. Sims, L.A. Rojas, D. Beck, R. Bonasio, R. Schüller, W.J. Drury, D. Eick, D. Reinberg, The C-  
664 terminal domain of RNA polymerase II is modified by site-specific methylation, *Science*. 332 (2011)  
665 99–103. <https://doi.org/10.1126/science.1202663>.
- 666 [65] S.M. Carr, S. Munro, B. Kessler, U. Oppermann, N.B. La Thangue, Interplay between lysine  
667 methylation and Cdk phosphorylation in growth control by the retinoblastoma protein, *EMBO J.* 30  
668 (2011) 317–327. <https://doi.org/10.1038/emboj.2010.311>.
- 669 [66] P. Korkuć, D. Walther, Towards understanding the crosstalk between protein post-translational  
670 modifications: homo- and heterotypic PTM pair distances on protein surfaces are not random,  
671 *Proteins*. 85 (2017) 78–92. <https://doi.org/https://doi.org/10.1002/prot.25200>.
- 672 [67] C. Maris, C. Dominguez, F.H.T. Allain, The RNA recognition motif, a plastic RNA-binding platform  
673 to regulate post-transcriptional gene expression, *FEBS J.* 272 (2005) 2118–2131.  
674 <https://doi.org/10.1111/j.1742-4658.2005.04653.x>.
- 675 [68] M. V Braga, F. Magaraci, S.O. Lorente, I. Gilbert, W. de Souza, Effects of Inhibitors of Delta24(25)-  
676 Sterol Methyl Transferase on the Ultrastructure of Epimastigotes of *Trypanosoma cruzi*, *Microsc.*  
677 *Microanal.* 11 (2005) 506–515. <https://doi.org/10.1017/S143192760505035X>.
- 678 [69] F. Magaraci, C.J. Jimenez, C. Rodrigues, J.C.F. Rodrigues, M.V. Braga, V. Yardley, K. De Luca-  
679 fradley, S.L. Croft, W. De Souza, L.M. Ruiz-perez, J. Urbina, D.G. Pacanowska, I.H. Gilbert,  
680 Azasterols as Inhibitors of Sterol 24-Methyltransferase in *Leishmania* Species and *Trypanosoma*  
681 *cruzi*, *J. Med. Chem.* 24 (2003) 4714–4727. <https://doi.org/10.1021/jm021114j>.
- 682 [70] W. Li, H.-Y. Wang, X. Zhao, H. Duan, B. Cheng, Y. Liu, M. Zhao, W. Shu, Y. Mei, Z. Wen, M.  
683 Tang, L. Guo, G. Li, Q. Chen, X. Liu, H.-N. Du, A methylation-phosphorylation switch determines  
684 Plk1 kinase activity and function in DNA damage repair, *Sci. Adv.* 5 (2019) eaau7566.  
685 <https://doi.org/10.1126/sciadv.aau7566>.

# 687 SUPPLEMENTARY FIGURES

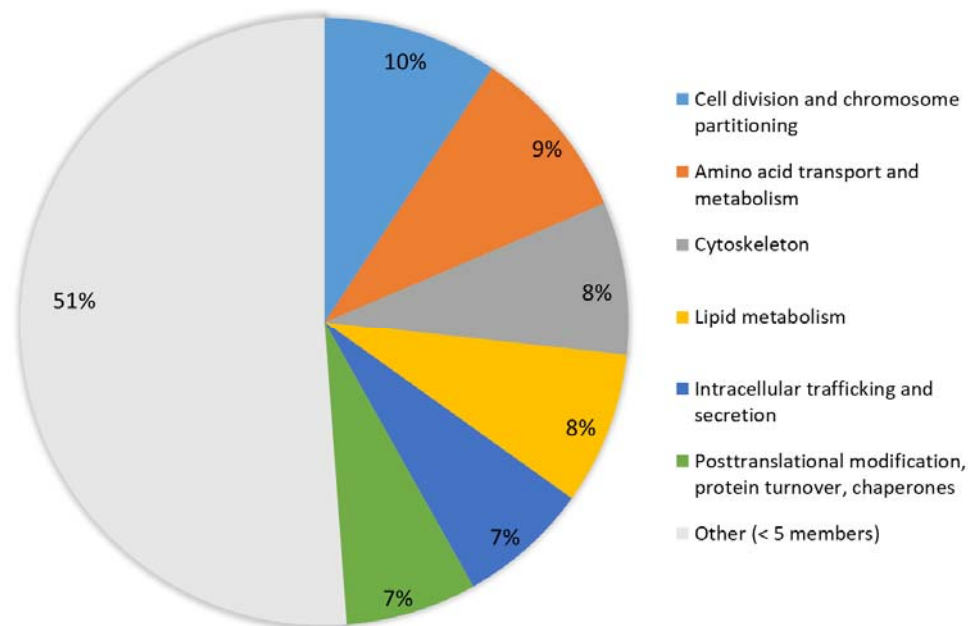

**Figure S1. Methylated proteins classified according to COG.** Classification of methylated proteins identified in this study with their terms predicted for the Clusters of Orthologous Groups.

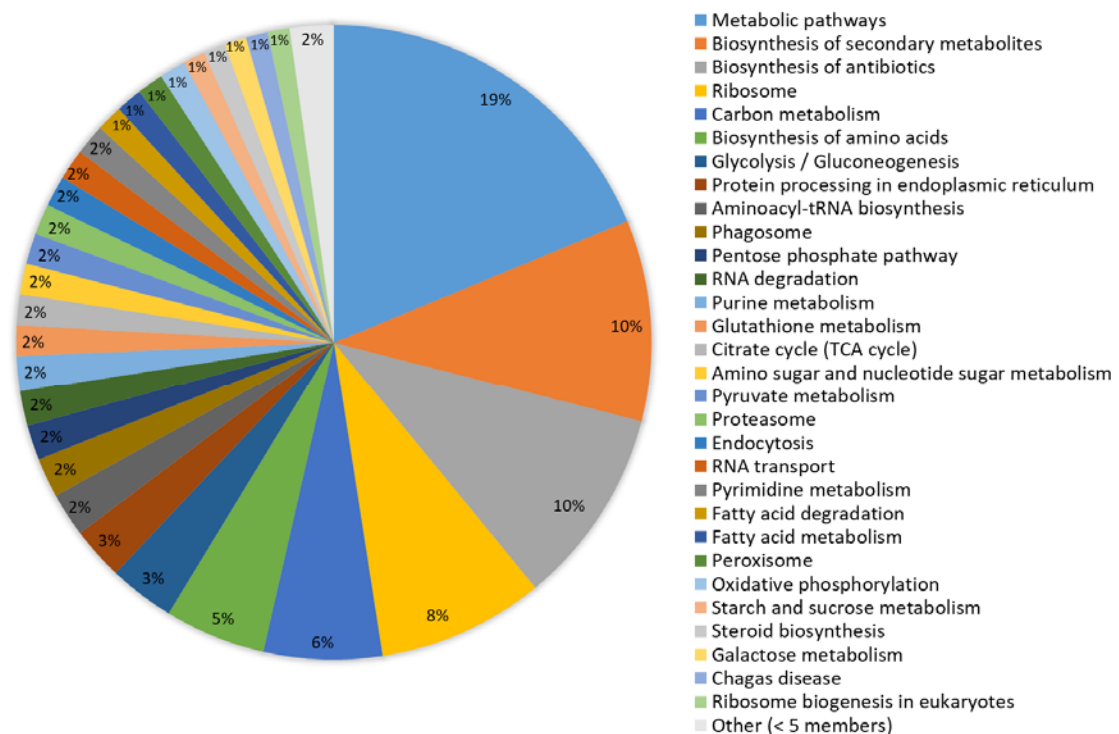

**Figure S2. Methylated proteins classified according to KEGG pathways.** Classification of methylated proteins identified in this study with their terms predicted for the Kyoto Encyclopedia of Genes and Genomes.

**A**

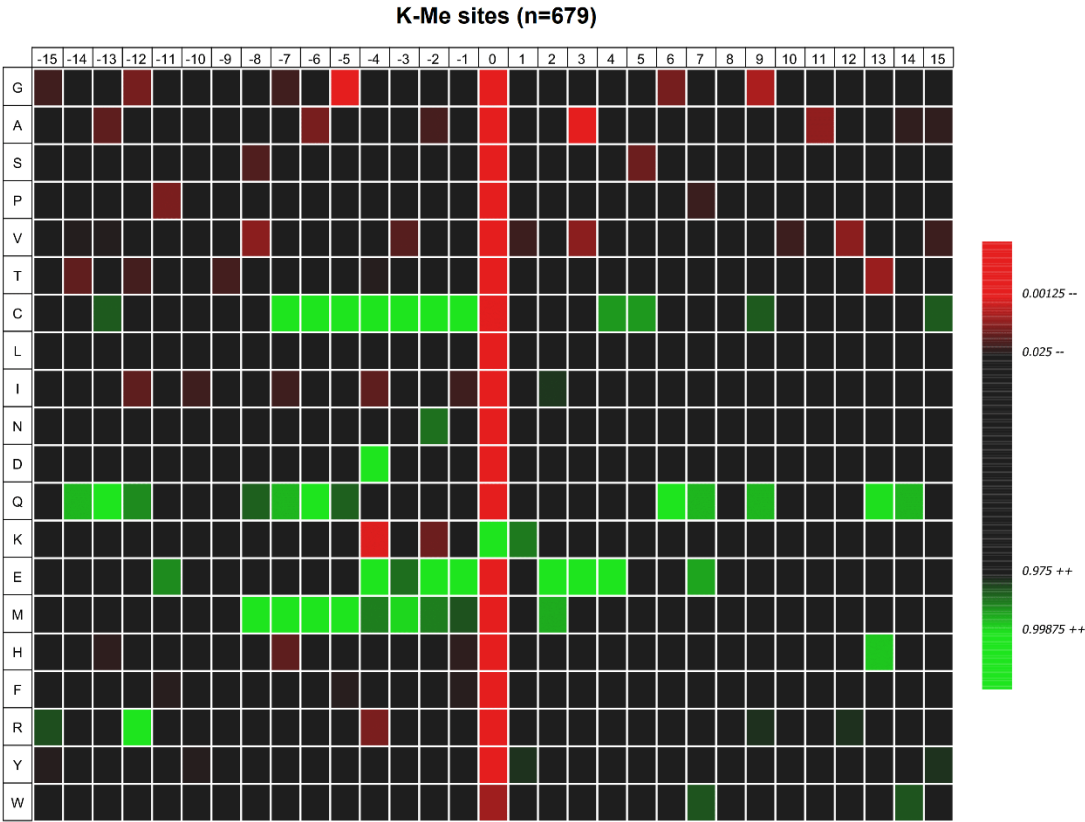

**B**

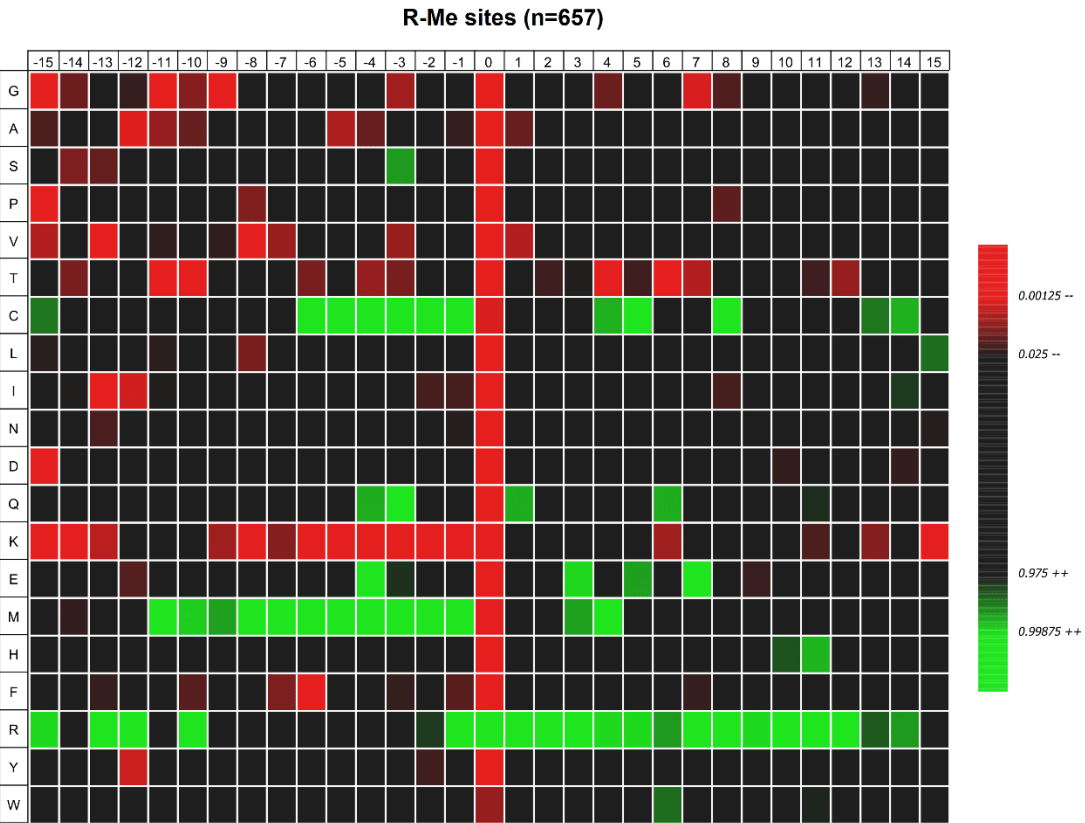

**Figure S3. Heatmap results of iceLogo analysis (related to Fig. 3).** Increased or decreased amino acid frequencies are shown in a gradient of respectively green or red shades for K-Me (A) and R-Me (B) sites.



## SUPPLEMENTARY TABLES

**Table S1 – Methylated proteins identified in *T. cruzi*.** List of all methylated proteins identified, with information about sequence coverage, statistics on the detection and type of methylation.

**Table S2 – Methylated sites identified in *T. cruzi*.** List of all arginine and lysine methylated sites identified, with type of methylation and statistics on the detection.

**Table S3 – Functional classification of *T. cruzi* methylproteome.** List of the terms of GO, COG and KEGG associated with the methylated proteins of our dataset.

**Table S4 – Functional enrichment of *T. cruzi* methylproteome.** List of the terms of GO significantly enriched in the methylated proteins dataset.

**Table S5 – The interaction network of *T. cruzi* methylproteome.** List of methylated proteins of the network analysis and their interaction information.

**Table S6 – Functional clustering of *T. cruzi* methylated and phosphorylated proteins.** The statistics of functional clusterization analysis of proteins with co-occurrence of methylation and phosphorylation in *T. cruzi*.
